1 TITLE PAGE

2 **Pathological modeling of TBEV infection reveals differential innate immune**  
3 **responses in human neurons and astrocytes that correlate with their**  
4 **susceptibility to infection.**

5 *Short title: Pathological modeling and cell-specific TBEV innate immunity*

6 *Authors*

7 Mazigh Fares<sup>1,2</sup>, Marielle Cochet-Bernoin<sup>1</sup>, Gaëlle Gonzalez<sup>1</sup>, Claudia N. Montero-Menei<sup>3</sup>,  
8 Odile Blanchet<sup>4</sup>, Alexandra Benchoua<sup>5</sup>, Claire Boissart<sup>5</sup>, Sylvie Lecollinet<sup>1</sup>, Jennifer  
9 Richardson<sup>1</sup>, Nadia Haddad<sup>6</sup>, Muriel Couplier<sup>1\*</sup>

10

11 *Author affiliation*

12 <sup>1</sup> UMR1161 Virologie, Anses, INRA, Ecole Nationale Vétérinaire d'Alfort, Université Paris-  
13 Est, Maisons-Alfort, France

14 <sup>2</sup>MRC-University of Glasgow Centre for Virus Research, Glasgow, Scotland, United  
15 Kingdom

16 <sup>3</sup> CRCINA, UMR 1232, INSERM, Université de Nantes, Université d'Angers, Angers F-  
17 49933, France

18 <sup>4</sup>CHU Angers, Centre de Ressources Biologiques, BB-0033-00038, Angers, France

19 <sup>5</sup>CECS, I-STEM, AFM, Evry, France,

20 <sup>6</sup> UMR BIPAR 956, Anses, INRA, Ecole Nationale Vétérinaire d'Alfort, Université Paris-Est,  
21 Maisons-Alfort, France

22

23 *\*Correspondence to:*

24 Email: [muriel.couplier@vet-alfort.fr](mailto:muriel.couplier@vet-alfort.fr)

25

26

27 *Author contribution*

28 Conceptualization : MF and MC ; Development or design of methodology : MF and MC ;  
29 Validation : MF and MC ; Formal analysis : MF ; Investigation : MF, MCB, GG ; Resources :  
30 CNMM, OB, AB, CB and SL ; Original draft preparation : MF and MC ; Writing, review and  
31 Editing : JR and NH ; Visualization : MF and MC ; Supervision : MC ; Project administration :  
32 MC ; Funding acquisition : NH and MC.

33

34

35 *Funding information:*

36 This study was financially supported by the French National Institute for Agricultural Research  
37 (INRA) and DIM MalInf-Ile de France. MF was financially supported by INRA and the Paris  
38 Institute of technology for life, food and environmental sciences (AgroParisTech). GG was  
39 funded by Labex IBEID. The funders had no role in study design, data collection and analysis,  
40 decision to publish, or preparation of the manuscript.

41

42

43 **Number of figures: 9                      Number of tables: 1              Number of pages: 39**

44 **Number of supplemental figures: 2              Number of supplemental tables: 1**

45 **Abstract Word Count: 254              Text Word Count: 6787**

46

## 48 **Abstract**

49 Tick-borne encephalitis virus (TBEV) is a member of the *Flaviviridae* family, *Flavivirus* genus,  
50 which includes several important human pathogens. It is responsible for neurological symptoms  
51 that may cause permanent disability or death, and, from a medical point of view, is the major  
52 arbovirus in Central/Northern Europe and North-eastern Asia. TBEV tropism is critical for  
53 neuropathogenesis, yet, little is known about the molecular mechanisms that govern the  
54 susceptibility of human brain cells to the virus. In this study, we sought to establish and  
55 characterize a new *in vitro* model of TBEV infection in the human brain and to decipher cell  
56 type-specific innate immunity and its relation to TBEV tropism and neuropathogenesis. We  
57 showed that infection of neuronal/glial cultures derived from human fetal neural progenitor  
58 cells (hNPCs) mimicked three major hallmarks of TBEV infection in the human brain, namely,  
59 preferential neuronal tropism, neuronal death and astrogliosis. We also showed that these cells  
60 had conserved their capacity to build an antiviral response against TBEV. TBEV-infected  
61 neuronal/glial cells, therefore, represented a highly relevant pathological model. By enriching  
62 the cultures in either human neurons or astrocytes, we further demonstrated qualitative and  
63 quantitative differential innate immune responses in the two cell types that correlated with their  
64 particular susceptibility to TBEV. Our results thus reveal that cell type-specific innate immunity  
65 is likely to contribute to shaping TBEV tropism for human brain cells. They offer a new *in vitro*  
66 model to further study TBEV-induced neuropathogenesis and improve our understanding of the  
67 mechanisms by which neurotropic viruses target and damage human brain cells.

68

69

## 70 **Author summary**

71 Tick-borne encephalitis virus (TBEV), a neurotropic *Flavivirus* that is responsible for  
72 encephalitis in humans, is of growing concern in Europe. Indeed, over the last two decades the

73 number of reported cases has continuously increased and the virus has spread into new  
74 geographical areas. Whereas it is well established that neurons are the main target of TBEV in  
75 the human brain, the mechanisms that underlie this preferential tropism have not yet been  
76 elucidated. Here, we used neuronal/glial cells derived from human fetal neural progenitors to  
77 establish and characterize a new *in vitro* pathological model that mimics major hallmarks of  
78 TBEV infection *in vivo*; namely, neuronal tropism, neuronal death and astrogliosis. Using this  
79 highly relevant model, we showed that human neurons and astrocytes were both capable of  
80 developing an innate immune response against TBEV, but with dissimilar magnitudes that  
81 correlated with differential susceptibility to TBEV. Our results thus revealed that TBEV  
82 tropism for subsets of human brain cells is likely to depend on cell-type specific innate  
83 immunity. This improves our understanding of the mechanisms by which neurotropic viruses  
84 target and damage human brain cells and may help guide development of future therapies.

85

86

## 87 **Introduction**

88 Tick-borne encephalitis virus (TBEV) belongs to the genus *Flavivirus* (family  
89 *Flaviviridae*), whose members include several important human pathogens transmitted by  
90 arthropods, such as Japanese encephalitis virus (JEV), West Nile virus (WNV), Zika virus  
91 (ZIKV) and Powassan virus (POWV). From a medical point of view, TBEV is the most  
92 important arbovirus in Europe and North-eastern Asia. Its endemic zone spreads from Northern,  
93 Central and Eastern Europe to Far East Asia (1). It induces a range of symptoms from mild flu-  
94 like symptoms to severe encephalitis and paralysis, often with long term neurological sequelae  
95 (2). The incidence of the disease has increased in recent decades and autochthonous cases are  
96 regularly reported in new areas of Western Europe, reflecting an expansion to non-endemic

97 areas (3). Despite commercialization of an effective vaccine (4), between 8000 and 13000  
98 annual cases of tick-borne encephalitis have been reported worldwide since the 1990s (5). No  
99 therapy is currently available (6).

100 TBEV is usually transmitted to humans from infected ticks, mainly of the *Ixodes* family,  
101 but may occasionally be acquired by consumption of unpasteurized dairy products from  
102 infected livestock (7–9). Upon inoculation into the human skin, initial infection and replication  
103 occurs in local dendritic cells (DCs). DCs are believed to transport the virus to draining lymph  
104 nodes from which it spreads into the bloodstream and induces viremia. It may then cross the  
105 blood brain barrier and cause widespread lesions in the brain. These include inflammatory  
106 changes, neuronal damage and glial reactivity in several brain areas, including the spinal cord,  
107 brainstem, cerebellum and striatum (10,11). Neurons are the primary target of infection (12)  
108 but other cells in the CNS may contribute to TBEV-induced neuropathogenesis. Both  
109 infiltrating immunocompetent cells, mainly CD8<sup>+</sup> T cells, and resident glial cells, such as  
110 astrocytes and microglial cells, have been shown to play a role (13,14). Neuronal damage may  
111 thus be mediated directly by viral infection or indirectly by infiltrating immunocompetent cells,  
112 inflammatory cytokines and activated resident glial cells.

113 The innate immune response is the first line of defense against viral infection. Type I  
114 interferons (IFNs) are of particular importance in this process. Through binding to the IFN  
115 alpha/beta receptor (IFNAR), they act via autocrine or paracrine signaling (15–17) and trigger  
116 the activation of a large number of interferon-stimulated genes (ISGs) that can inhibit almost  
117 every step of viral life cycle (18). In recent years, it has become clear that parenchymal cells of  
118 the central nervous system (CNS) play a major role in the development of the innate immune  
119 response and the protection of infected individuals after CNS infection (19–24). Neurons and  
120 astrocytes are not passive targets, as they are known to produce and respond to type I IFNs.

121 Nevertheless, the innate immune programs activated in these cell types during TBEV infection  
122 and their impact on viral tropism and neuropathogenesis remain poorly known.

123 Animal models have been widely used to elucidate the cellular and molecular  
124 mechanisms of TBEV-induced neuropathogenesis (2). Nevertheless, the results obtained from  
125 such studies may be difficult to transpose to human neuropathogenesis, as human anti-viral  
126 responses differ substantially from those of other mammalian species (25, 26). The biological  
127 relevance of models based on human CNS cells is thus increasingly recognized. These include  
128 neuronal/glial cell lines, primary neuronal/glial cells from human fetuses and, more recently,  
129 neuronal/glial cells derived from fetal neural progenitors (hNPCs), embryonic (hESC) or  
130 induced pluripotent stem cells (hiPSCs). While primary human CNS cells are physiologically  
131 more relevant than cell lines, their use is limited by the difficulty in gaining access to cell  
132 sources. On the other hand, neuronal/glial cultures derived from neural progenitors are not only  
133 physiologically relevant, but also have the advantage of being available on demand. In recent  
134 years, they have become important tools to study neurotropic viruses (27).

135 The goal of this study was, first, to set up and characterize a new *in vitro* model of TBEV  
136 infection using complex co-cultures of hNPC-derived neuronal/glial cells, and second, to  
137 decipher cell-specific anti-TBEV immunity in the human CNS and its relation to TBEV tropism  
138 and neuropathogenesis. We showed that *in vitro* TBEV infection mimics several hallmarks of  
139 *in vivo* infection, including marked neuronal tropism and neuronal death, limited astrocyte  
140 susceptibility, astrogliosis and induction of an antiviral response. Moreover, we demonstrated  
141 differential qualitative and quantitative antiviral capacities in human neurons and astrocytes  
142 that are correlated with their susceptibility to TBEV infection. Finally, we showed that human  
143 astrocytes exert a protective effect on neighboring TBEV-infected neurons.

144

## 145 **Results**

### 146 **TBEV infects brain cells differentiated from human fetal neural progenitors**

147       HNPCs and their derived neuronal/glia cells were previously set up in our laboratory  
148 for the study of Borna disease virus, a neurotropic virus that belongs to the *Bornaviridae* family  
149 (28, 29). Here, we used the same hNPCs prepared according to the experimental steps  
150 summarized in Fig. 1A. HNPCs were differentiated for 13 days, by which time all neurons were  
151 generated (29), before infection with the TBEV-Hypr strain at MOI  $10^{-2}$ . Infected neuronal/glia  
152 co-cultures were then analyzed over time. We first examined the capacity of the virus to infect,  
153 replicate and disseminate within the co-culture. Examination of cells immunostained with an  
154 antibody specific for domain 3 of the TBEV envelope protein (TBEV-E3), at 24 and 72 hours  
155 post-infection (hpi), revealed that TBEV entered human brain cells and spread within the co-  
156 culture (Fig. 1B). Enumeration of infected cells from 14 hpi to 7 dpi showed that  $7.3 \pm 0.7\%$  of  
157 cells were indeed infected at 14 hpi whereas  $45.0 \pm 4.0\%$  were infected at 72 hpi, at the peak of  
158 infection (Fig. 1C). At a later time, 7 dpi, the number of infected cells decreased. A similar  
159 pattern of infection was observed when the viral RNA was quantified by RT-qPCR, whether in  
160 the supernatant or intracellularly, from 14 hpi to 7 dpi (Fig. 1D) with an increase in viral RNA  
161 observed up to 48-72 hpi followed by a decrease from 96 hpi to 7 dpi. This confirmed active  
162 replication of the virus in hNPC-derived brain cells. Quantification of viral titer by end-point  
163 dilution further showed that infectious particles were released into the supernatant at 48 and 72  
164 hpi (Fig. 1E). Thus, the infection, replication and dissemination of virus were efficient in hNPC-  
165 derived neuronal/glia cells.

166

## 167 **TBEV infects human neurons, astrocytes, and oligodendrocytes**

168 We next sought to determine which neural subsets were infected by TBEV in  
169 neuronal/glial co-cultures. We had previously shown that, upon growth factor withdrawal,  
170 hNPCs differentiated into neurons and astrocytes (28,29). Oligodendrocytes, the third cell type  
171 that can be generated by differentiation of hNPCs, were not taken into consideration. To gain  
172 in precision, in the present study we enumerated all 3 cell types, based on immunofluorescence  
173 staining (S1A Fig), 13 and 21 days after the onset of differentiation. Automatic enumeration of  
174 immunostained cells with antibodies directed against HuC/HuD (nuclear markers for neurons)  
175 and OLIG2 (nuclear marker for oligodendrocytes) revealed a population composed of  
176 77.0±3.2% (d13) and 74.1±5.4% (d21) neurons and 1.4±1.0% (d13) and 3.7±1.0% (d21)  
177 oligodendrocytes (S1B Fig). Due to technical limitations (GFAP localization in astrocytic  
178 outgrowths and unavailability of a nuclear marker), astrocytes could not be automatically  
179 enumerated. The remaining population, namely total cells minus neurons and oligodendrocytes,  
180 comprising 21.5±4.1% (d13) and 22.2±4.4% (d21) of cells, was therefore considered to be  
181 composed of astrocytes (S1B Fig). The reliability of this enumeration procedure was confirmed  
182 by manual enumeration, as 22.8±5.6% (d13) and 32.7±5.0% (d21) of astrocytes were found  
183 using this method (S1C Fig). Thus, we confirmed that neurons and astrocytes were the major  
184 cell types in our co-cultures and showed that oligodendrocytes constituted less than 5% of the  
185 total cell population.

186 To characterize TBEV cellular tropism, we infected hNPC-derived neuronal/glial co-  
187 cultures and followed infection from 14 hours to 7 days. Cells were co-immunostained with  
188 antibodies directed against TBEV-E3 (infected cells) and  $\beta$ III-tubulin or HuC/HuD (neurons),  
189 GFAP (astrocytes) and OLIG2 (oligodendrocytes). At 24 hpi, the 3 cell types were infected, as  
190 shown in fig. 2A. Viral envelope strongly accumulated in the perinuclear region of the  
191 cytoplasm in all cell types. The protein could also be evidenced in certain neurites and astrocyte



192 outgrowths, albeit with a lower intensity (Fig. 2B). We then sought to determine whether the  
193 virus spread within each cellular subpopulation. We therefore quantified infection in each cell  
194 type, at different time points during the course of the study (Fig. 2C, 2D, 2E). The general  
195 profile of infection was similar in the 3 cell types, with an increase in the first days of infection  
196 up until a peak occurring at 48-72 hpi, followed by a decrease at 7 dpi, except for  
197 oligodendrocytes in which case no decrease was observed. Early in infection, at 14 hpi, a  
198 minority of cells were infected within each subset, namely  $7.9\pm 1.2\%$  of neurons,  $4.3\pm 1.5\%$  of  
199 astrocytes and  $11.7\pm 0.8\%$  of oligodendrocytes. Later, however, at the peak of infection, the  
200 proportion of infected cells was high in neurons ( $55.2\pm 3.8\%$ ) and oligodendrocytes  
201 ( $68.0\pm 21.5\%$ ) but much lower in astrocytes ( $13.6\pm 5.3\%$ ), revealing differential propagation of  
202 the virus within the three sub-population. Thus, whereas human neurons and oligodendrocytes  
203 were highly susceptible to TBEV infection, human astrocytes were more resistant.

204

### 205 **TBEV induces death of neurons and astrocytes**

206 As hNPC-derived neuronal/glia cells were highly infected, we then sought to evaluate  
207 whether TBEV induced cellular damages. Cultures were infected and cells were fixed at several  
208 time points from 14 hpi to 14 dpi before immunostaining with antibodies specific for neuronal  
209 and glial cells, as previously described. We first examined the neuronal population. At 14 dpi,  
210 examination of HuC/HuD immunostaining revealed that TBEV-infected co-cultures were  
211 strongly depleted in neurons, as compared with their non-infected matched controls (Fig. 3A).  
212 Enumeration showed that neuronal survival was unaffected in the first days of infection (from  
213 14 to 48 hpi), but confirmed that neuronal loss occurred as early as 72 hpi ( $25.1\pm 5.4\%$  loss) and  
214 steadily increased from this point on, reaching  $72.0\pm 10.3\%$  at 14 dpi, the latest time point of  
215 our study (Fig. 3B). We then examined neuronal morphology based on  $\beta$ III-tubulin  
216 immunostaining. At 7 dpi, a striking loss of neurites was observed in TBEV-infected cultures

217 as compared with their non-infected matched controls (Fig. 3C). Quantification of total neurite  
218 length confirmed their loss not only at 7 dpi ( $76.1\pm 21.6\%$  decrease), but also at 72 hpi  
219 ( $62.0\pm 22.6\%$  decrease), whereas they were unaffected at an earlier time point (14 hpi) (Fig.  
220 3D). Of note, whereas neuronal death became progressively more pronounced between 72 hpi  
221 and 7 dpi, neurite loss peaked as early as 72 hpi, suggesting that neurites alteration precedes  
222 neuronal death. Taken together, these results showed that TBEV infection strongly impaired  
223 neuronal survival in the co-cultures and, moreover, suggested that neurite alteration preceded  
224 neuronal death.

225 We next evaluated whether glial cells were damaged. Examination of astrocytes  
226 immunostained with an antibody directed against GFAP at 7 dpi revealed hypertrophic cells in  
227 TBEV-infected cultures, as compared with their non-infected matched controls (Fig. 4A). This  
228 change in morphology is reminiscent of astrogliosis, a common feature of stressed astrocytes.  
229 Enumeration of GFAP-positive cells was then carried out at 24 hpi, 72 hpi and 7 dpi. Their  
230 number was not significantly altered at the earlier time points, 24 hpi and 72 hpi, but a decrease  
231 of  $20.7\pm 11.1\%$  was observed at 7 dpi compared with non-infected matched controls (Fig. 4B).  
232 Thus, TBEV infection diminished survival of not only neurons but also astrocytes, although in  
233 a more moderate manner for the latter. By contrast, enumeration of OLIG-2-positive cells did  
234 not reveal a significant difference in oligodendrocyte number in TBEV-infected and non-  
235 infected cultures (Fig. 4C), showing that despite direct TBEV infection, survival of  
236 oligodendrocytes was unaffected. Taken together, our results demonstrated that subsets of  
237 hNPC-derived brain cells, that is, neurons, astrocytes and oligodendrocytes, were differentially  
238 affected by TBEV infection. In particular, neurons were highly susceptible as regards both  
239 infection and mortality, whereas astrocytes were more resistant. Oligodendrocytes were  
240 susceptible to infection, but their survival was unaffected.

241

242 **Human NPC-derived neuronal/glial co-cultures develop a strong antiviral response to**  
243 **TBEV infection**

244 When infected with virus, cells initiate an antiviral response that aims at controlling  
245 viral replication. In order to determine whether the human neuronal/glial cells used in our study  
246 had conserved the capacity to develop such a response upon TBEV infection, we analyzed the  
247 differential expression of 84 human genes involved in the antiviral response, using a PCR array  
248 approach. Transcripts from hNPC-derived neuronal/glial cells infected with TBEV for 24 h  
249 were pooled from biological triplicates and compared with their matched non-infected controls.  
250 The studied genes are shown in fig. 5A. After applying an arbitrary cut-off of 3-fold, 25 genes  
251 were shown to be significantly modulated in TBEV-infected cells, amongst which 22 genes  
252 were up-regulated and 3 were down-regulated (Fig. 5A). The former category included  
253 pathogen recognition receptors (PRRs), cytokines, including IFN $\beta$ , and ISGs. Overexpression  
254 of nine of these genes, 3 PRRs - IFIH1/MDA5 (Fig. 5B), DDX58/RIG-I (Fig. 5C) and TLR3  
255 (Fig. 5D), 3 pro-inflammatory cytokines - CXCL10 (Fig. 5E), CCL5/RANTES (Fig. 5F) and  
256 CXCL11 (Fig. 5G) - and 3 ISGs - OAS2 (Fig. 5H), MX1 (Fig.5I) and ISG15 (Fig. 5J) - was  
257 confirmed using RT-qPCR. IFI6 (Fig. 5K), an additional ISG that was recently shown to protect  
258 cells from *Flavivirus* infection (30), was also shown to be overexpressed. For most of these  
259 genes, kinetic analyses further revealed that their expression was activated as early as 7 hpi and  
260 progressively increased during the course of infection up to 14 dpi, with the exception of pro-  
261 inflammatory cytokines whose expression abruptly decreased at 14 dpi (Fig. 5E-G). The latter,  
262 however, remained highly overexpressed, as compared with their matched non-infected  
263 controls. These data indicated that TBEV-infected hNPC-derived neuronal/glial cells had the  
264 capacity to respond to TBEV infection by developing a strong and lasting antiviral response.

265

## 266 **Differential antiviral response in human neurons and human astrocytes**

267           Neurons and astrocytes are both known to participate in the antiviral response in the  
268 CNS (20, 31). As regards oligodendrocytes, little is known so far (32). Our results, showing  
269 high susceptibility of neurons but resistance of astrocytes to TBEV infection, led us to  
270 hypothesize that differences in their intrinsic capacity for antiviral defense might underlie their  
271 differential susceptibility. In order to test this hypothesis and decipher cell autonomous anti-  
272 TBEV innate immunity in the human CNS, we sought to obtain cultures enriched in neurons  
273 (henceforth called En-N) or astrocytes (henceforth called En-As) and to compare their antiviral  
274 response. Oligodendrocytes were not considered further in this study, as their low number in  
275 our cultures precluded enrichment. After differentiation of hNPCs for 13 days, neuronal/glia  
276 cells were trypsinized and either directly re-seeded (unsorted cultures henceforth called Uns-C)  
277 or enriched for neurons (En-N) or astrocytes (En-As). We showed that the splitting procedure  
278 did not alter the neuronal/glia co-cultures (Uns-C). Indeed, four days after re-seeding, phase-  
279 contrast microscopy of Uns-C revealed typical neuronal (small sized with neurites) and  
280 astroglial (larger, flat, with outgrowths) cells (Fig. 6A), as typically observed in non-trypsinized  
281 co-cultures (henceforth called Co-C cells). Cell type composition (74.1±4.1% neurons,  
282 20.8±4.9% astrocytes and 5.1±1.2% oligodendrocytes) and basal expression of antiviral genes  
283 (analysis of 84 genes of the antiviral response) were unchanged in Uns-C as compared with Co-  
284 C cells (Fig. 6B and Fig. 6C, respectively). Enrichment of neurons and astrocytes was  
285 confirmed by phase-contrast microscopy (Fig. 6D and 6F, respectively) and cell enumeration,  
286 showing that the En-N population was composed of 94.1±0.4% neurons, 3.1±0.4% astrocytes  
287 and 2.8±0.2% oligodendrocytes (Fig. 6E) while the En-As population comprised 53.5±2.7%  
288 astrocytes, 35.7±2.8% neurons and 10.8±0.5% oligodendrocytes (Fig. 6 G).

289           We then sought to determine whether distinct antiviral responses occurred in En-As,  
290 En-N and Uns-C upon TBEV infection, which would reflect differential antiviral responses in

291 human neurons and astrocytes. Cells were infected for 24 h and the expression of 84 genes of  
292 the antiviral response was compared using the same PCR array as previously described. After  
293 application of the usual arbitrary cut-off of 3-fold, 20 genes in TBEV-infected Uns-C, 16 genes  
294 in TBEV-infected En-N and 21 genes in TBEV-infected En-As were shown to be significantly  
295 up-regulated, as compared with their non-infected matched controls (Fig. 7A). Among the set  
296 of over-expressed genes, which overlapped with that of non-trypsinized co-cultures, 13 were  
297 common to the three cultures (table 1) while others were specific for En-As or En-N cultures  
298 (8/21 and 3/16, respectively). Thus, these results showed that the antiviral program activated  
299 by TBEV was partially different in human neurons and astrocytes. Of note, for 12/13 of  
300 common genes, the magnitude of up-regulation was correlated to the percentage of astrocytes  
301 in the cultures. That is, it was much higher in En-As than in En-N and intermediary in Uns-C  
302 (Fig. 7A, table 1), showing that human astrocytes were capable of developing a stronger  
303 antiviral response to TBEV than human neurons. To validate the PCR array data and to gain  
304 further insight into the kinetics of expression of antiviral genes in each cell types, we performed  
305 RT-qPCR at 7, 24, and 72 hpi for 3 PRRs — IFIH1 (MDA5) (Fig. 7B), DDX58 (RIG-I) (Fig.  
306 7C), and TLR3 (Fig. 7D) —, two ISGs — OAS2 (Fig. 7E) and MX1 (Fig. 7F) —, and one pro-  
307 inflammatory cytokine, CXCL10 (Fig. 7G). Because of their well-known anti-flavivirus  
308 activity, the ISGs IFI6 (Fig. 7H) and RSAD2 (viperin) (Fig. 7I) were also studied. In  
309 confirmation of the PCR array data, all of these genes were significantly more overexpressed  
310 in En-As than in En-N, at both 24 and 72 hpi. In addition, at 72 hpi, gene expression in En-N  
311 was either maintained (RIG-I, TLR3, OAS2, viperin, CXCL10) or decreased (MDA5, MX1,  
312 IFI6) while it was either maintained (MDA5, TLR3, MX1, viperin) or increased (RIG-I, OAS2,  
313 CXCL10, IFI6) in En-As, showing that the duration of antiviral responses was shorter in human  
314 neurons than astrocytes. The induction of an astrocyte-specific antiviral program, as suggested  
315 by the selective overexpression of 8 genes in En-As (Fig. 7A, Table 1), was further confirmed

316 by the results of RT-qPCR. Not only TLR3 but also viperin were amongst those genes, as  
 317 upregulation was observed in En-As at 24 hpi and 72 hpi but not in En-N at either time point  
 318 (Fig. 7D and Fig. 7I). Thus, taken together, these results show that TBEV infection induces an  
 319 antiviral response in human neurons and astrocytes that is characterized by activation of an  
 320 overlapping set of genes. This anti-viral program, however, was of greater intensity and longer  
 321 duration in human astrocytes than in human neurons. The anti-viral programs of the two cell  
 322 types were also notably distinct, as exemplified by selective overexpression of the gene  
 323 encoding viperin, well-known for its anti-TBEV activity (33,34), in human astrocytes. In sum,  
 324 our results revealed a stronger and broader antiviral response in human astrocytes than in human  
 325 neurons, in keeping with their differential susceptibility to TBEV infection, astrocytes being  
 326 more resistant and neurons more susceptible.

327

328

329

330 **Table 1**

331

| Gene name     | Fold regulation |              |               |
|---------------|-----------------|--------------|---------------|
|               | Uns-C           | En-Ne        | En-As         |
| <b>CXCL10</b> | <b>1024,0</b>   | <b>415,9</b> | <b>1209,3</b> |
| <b>MX1</b>    | <b>367,1</b>    | <b>39,1</b>  | <b>975,5</b>  |
| <b>CCL5</b>   | <b>680,3</b>    | <b>265,0</b> | <b>814,6</b>  |
| <b>IFNB1</b>  | <b>149,1</b>    | <b>71,5</b>  | <b>537,5</b>  |
| <b>OAS2</b>   | <b>215,3</b>    | <b>23,9</b>  | <b>498,0</b>  |
| <b>CXCL11</b> | <b>270,6</b>    | <b>126,2</b> | <b>388,0</b>  |
| <b>ISG15</b>  | <b>61,8</b>     | <b>31,8</b>  | <b>105,4</b>  |
| <b>IFIH1</b>  | <b>32,7</b>     | <b>19,7</b>  | <b>35,3</b>   |
| <b>DHX58</b>  | <b>13,2</b>     | <b>10,6</b>  | <b>28,2</b>   |
| <b>CASP1</b>  | <b>10,5</b>     | <b>6,3</b>   | <b>24,6</b>   |
| <b>CXCL8</b>  | <b>28,4</b>     | <b>11,4</b>  | <b>23,1</b>   |
| <b>DDX58</b>  | <b>10,5</b>     | <b>5,7</b>   | <b>16,0</b>   |
| <b>IL6</b>    | <b>7,4</b>      | <b>10,6</b>  | <b>8,2</b>    |
| <b>STAT1</b>  | <b>5,8</b>      | <b>2,5</b>   | <b>7,5</b>    |

|               |  |            |            |            |
|---------------|--|------------|------------|------------|
| <b>TLR3</b>   |  | <b>6,2</b> | <i>1,7</i> | <b>6,4</b> |
| <b>IRF7</b>   |  | <b>5,0</b> | <i>0,9</i> | <b>5,3</b> |
| <b>CTSS</b>   |  | <b>4,3</b> | <i>1,3</i> | <b>5,2</b> |
| <b>TRIM25</b> |  | <b>3,6</b> | <i>2,2</i> | <b>4,5</b> |
| <b>AIM2</b>   |  | <i>0,9</i> | <i>1,0</i> | <b>4,0</b> |
| <b>MYD88</b>  |  | <i>2,4</i> | <i>1,1</i> | <b>3,7</b> |
| <b>TNF</b>    |  | <b>4,5</b> | <i>2,6</i> | <b>3,7</b> |
| <b>IL15</b>   |  | <b>3,8</b> | <b>3,3</b> | <i>2,3</i> |
| <b>IFNA1</b>  |  | <i>0,9</i> | <b>3,6</b> | <i>1,2</i> |
| <b>IL12B</b>  |  | <i>0,9</i> | <b>5,9</b> | <i>1,2</i> |

332

333

334 Differential expression of antiviral genes in human neurons and astrocytes following  
335 TBEV infection may reflect differential baseline expression in the two cell types. To test this  
336 hypothesis, non-infected En-N, Uns-C and En-As cells were cultured for 4 days and transcripts  
337 from 3 biological samples in each condition were pooled and compared using the human  
338 antiviral response PCR array. Antiviral gene expression in En-N was compared with that of  
339 Uns-C (Fig. 7J) and En-As (Fig. 7K). Although in both cases, most of the immunity-related  
340 genes were not differentially expressed to a significant extent (above the 3-fold threshold  
341 recommended by the manufacturer), we observed that the general tendency was to a slight  
342 overexpression in astrocytes, since the number of significantly overexpressed genes increased  
343 as the percentage of astrocytes increased in the culture, from Uns-C to En-A. Five/84 genes  
344 were, indeed, overexpressed in Uns-C compared with En-N (Fig. 6J), while their number rose  
345 to 14/84 genes when En-As were compared with En-N (Fig. 6K). By contrast, very few of these  
346 genes (3/84) were overexpressed in human neurons, and then only to a modest extent. To  
347 validate these results, differential expression of 3 selected genes, 2 PRRs (MDA5 and RIG-I)  
348 and 1 ISG (OAS2), was further addressed by RT-qPCR. Significant overexpression of MDA5  
349 (Fig. 7L) and RIG-I (Fig. 7M) in En-As as compared with En-N was confirmed. By contrast,  
350 but still in agreement with the PCR array data, no significant difference was observed for the

351 OAS2 gene (Fig. 7N). These results thus showed that the basal level of expression of certain  
352 antiviral genes was higher, albeit slightly, in human astrocytes than in human neurons.

353

354 **Human astrocytes protected human neurons from TBEV infection and TBEV-induced**  
355 **damage.**

356 Next, we wondered whether human astrocytes might participate in neuronal defense.  
357 We reasoned that, if this were the case, neurons would be more sensitive to TBEV infection in  
358 cultures depleted of astrocytes. We therefore compared neuronal susceptibility and  
359 vulnerability to TBEV infection in Uns-C and En-N, composed of  $20.8 \pm 4.9\%$  and  $3.1 \pm 0.4\%$  of  
360 astrocytes, respectively. Uns-C and En-N were infected for 24h and the percentage of TBEV-  
361 infected neurons within the total neuronal population was quantified based on  $\beta$ III-tubulin and  
362 TBEV-E3 immunostaining. A 30% increase in infected cells was observed in En-N compared  
363 with Uns-C (Fig. 8A), showing that, in the absence of astrocytes, neurons were more sensitive  
364 to TBEV infection. At that time, neuronal survival was altered neither in TBEV-infected Uns-  
365 C nor in TBEV-infected En-N, as revealed by observation of  $\beta$ III-tubulin immunostaining (Fig.  
366 8B) and enumeration of neurons (S2 Fig.). At 72 hpi, however, a more dramatic alteration of  
367 neuronal morphology was observed in TBEV-infected En-N, as compact clusters, characteristic  
368 of intense neuronal death, were formed (Fig. 8B). Due to these clusters, it was not possible to  
369 enumerate the neurons, but our results clearly showed that, at 72 hpi, neurons were more  
370 dramatically affected in cultures deprived of astrocytes. Thus, taken together, these results  
371 showed that, upon TBEV infection, the presence of astrocytes was protective for human  
372 neurons.

373



## 374 Discussion

375 Despite its importance in human health, TBEV-induced neuropathogenesis is still  
376 poorly understood. So far, most studies have used either *in vitro* or *in vivo* rodent models.  
377 Whereas these models have advanced understanding, extrapolation to human  
378 neuropathogenesis may not always be relevant, as cellular responses display profound  
379 differences between species (25,26, 35). Here we used neuronal/glial cultures derived from  
380 human fetal neural progenitor cells as a more accurate *in vitro* model to study anti-TBEV innate  
381 immunity and its relation to tropism and neuropathogenesis in the human brain. We developed  
382 a new *in vitro* model that mimics major hallmarks of TBEV infection in the human brain,  
383 namely, neuronal tropism, neuronal death and astrogliosis, thereby providing a unique and  
384 highly relevant pathological model for studying TBEV-induced neuropathogenesis. Moreover,  
385 we revealed that a cell-type-specific innate antiviral state in human neurons and astrocytes  
386 correlates with their differential susceptibility and vulnerability to TBEV, which strongly  
387 suggests that the innate antiviral response shapes TBEV tropism for human brain cells.

388 Understanding viral tropism is critical for understanding virus-induced  
389 neuropathogenesis. Some viruses, like Zika virus, preferentially infect neural progenitors  
390 (36,37) whereas human immunodeficiency virus has a strong affinity for microglial cells (38),  
391 JC virus for astrocytes (39) and the JHM strain of mouse hepatitis virus (JHMV) for  
392 oligodendrocytes (40). Flaviviruses such as TBEV, WNV and JEV have a preferential tropism  
393 for neurons, a feature that has been observed in human patients (12,41,42), as well as in rodent  
394 models (43,44). Using human neuronal/glial cultures, we reproduced the preferential neuronal  
395 tropism that is observed *in vivo* in showing a high percentage of infected neurons  
396 (approximately 55% at the peak of infection) together with a low percentage of infected  
397 astrocytes (less than 15 %). The limited capacity of the virus to infect astrocytes, as observed  
398 in our cultures, as well as in monocultures of rat or human astrocytes (45–47), may explain the

399 lack of detection of infected astrocytes in post-mortem brain tissues from patients with tick-  
400 borne encephalitis (12), or their rare detection in Langat virus-infected mice (44), as  
401 infrequently infected cells are likely to escape detection. Similar observations have been made  
402 for other neurotropic viruses (48–50). Unexpectedly, we also observed infection of  
403 oligodendrocytes in the human neuronal/glia cultures, a finding that has never been reported  
404 previously. The *in vivo* significance of this observation is at present unknown, especially  
405 because the degree of maturation of oligodendrocytes in our culture is undefined, the OLIG2  
406 antibody recognizing mature and immature cells indiscriminately (51). However, this should  
407 be kept in mind for future examination of brain tissues from infected patients. As these cells  
408 represent about 5 % of the total cell population in our cultures, we believe them to have a minor  
409 impact *in vitro* and, as we could not enrich them, they were not further considered and we  
410 confined our study to neurons and astrocytes. We questioned the reasons that may explain  
411 difference in TBEV tropism for these two cell types. This may be due to differential expression  
412 of cellular factors that are necessary for establishing a full viral cycle (entry and post-entry  
413 events), but the similar percentage of infected neurons and astrocytes that we observed in the  
414 first 14 hours following TBEV infection does not lend support for this hypothesis. An  
415 alternative hypothesis would be differential capacity of the cell types to develop a protective  
416 antiviral response. The innate immune response, a major component of the antiviral response,  
417 has indeed been proven to be critically important in restricting infection by neurotropic viruses  
418 (52–54) and in determining TBEV tropism in different brain areas in murine models (44,55).  
419 Also, studies using rodent models have shown that distinct brain cell types develop different  
420 antiviral states. Microglia and astrocytes, for example, which were initially considered to be the  
421 sole sentinels that respond to microbial infection within the brain (56,57) have been shown to  
422 behave differently, as microglia developed a more robust response than astrocytes to TLR7  
423 activation (58). Neurons, long considered to be merely passive targets, are now known to

424 participate in the antiviral response and viral restriction (19–21,59) and in humans, neurons and  
425 astrocytes have been shown to produce and respond to IFN $\alpha/\beta$ . Despite a general assumption  
426 that astrocytes are more important players in antiviral response than neurons, the relative  
427 contribution of each cell types has, however, not been formally demonstrated, as direct  
428 comparison has never been made, whether in animal or in human *in vitro* models. Here we  
429 provided the first evidence that human neurons derived from fetal neural progenitor cells  
430 possess all of the necessary machinery to mount a cell-intrinsic antiviral response against  
431 TBEV, as they up-regulated IFN $\beta$ , ISGs and pro-inflammatory cytokine mRNAs upon TBEV  
432 infection. We also demonstrated for the first time that human neurons and astrocytes differ in  
433 their capacity to mount an anti-TBEV response. Differences were indeed observed in the  
434 repertoire of the antiviral program that is activated in the two cell types upon TBEV infection,  
435 with certain genes over-expressed in astrocytes but not in neurons, such as the RSAD2 gene  
436 (encoding viperin), an ISG that has been shown to be highly important for controlling TBEV  
437 (33,34) and other flaviviruses (55) in the rodent's CNS. Quantitative differences were also  
438 observed as transcripts encoding PRRs and genes of IFN signaling were over-expressed with  
439 different magnitudes in human neurons and astrocytes, with a stronger and more durable  
440 response in astrocytes than in neurons. Our results thus show that the cell-type specific anti-  
441 TBEV response is correlated with the susceptibility of human neurons and astrocytes to TBEV,  
442 which strongly suggests that innate antiviral response is responsible for shaping TBEV tropism  
443 in human brain cells. Whether the high neuronal susceptibility to TBEV infection is due to a  
444 weaker general antiviral program in human neurons, involving multiple components of the IFN  
445 response, from the PRRs to ISGs, or rather to lower expression of specific ISGs, such as the  
446 RSAD2 or IFI6 genes, that are dedicated to the control of flaviviruses (30), remains to be  
447 elucidated. It also remains to be determined whether the antiviral response of neurons is weak  
448 in response to infection by any neurotropic viruses, or only by certain viruses, such as

449 flaviviruses, or whether it is specific to TBEV infection. Our observation that the baseline  
450 expression of certain antiviral genes is lower in neurons than in astrocytes may argue in favor  
451 of the first possibility, a hypothesis that should be addressed in future studies. In contrast to our  
452 results, TBEV infection in the human neuronal DAOY cells, a human neuroblastoma, led to  
453 overexpression of the RSAD2 gene (60), a discrepancy that may be due to the use of non-  
454 physiological, immortalized cells in the study from Selinger et al. (2017). Of note, our results  
455 showed that neuronal tropism of TBEV does not depend only on the cell-specific antiviral  
456 response in human neurons, as the presence of astrocytes in the culture limited their infection  
457 and favored their survival. As it was previously reported that murine astrocytes infected with  
458 TBEV were protective to neurons through IFN signaling (45), and as we showed that IFN $\beta$  was  
459 highly up-regulated by human astrocytes upon TBEV infection, we speculate that IFN $\beta$   
460 produced by astrocytes acts in a paracrine manner to restrict neuronal infection in our human  
461 neuronal/glial co-cultures.

462         Viral tropism and pathogenesis are intimately linked, but how the former governs the  
463 latter in the human CNS, during TBEV infection, is incompletely understood. TBEV  
464 preferentially infects and kills the neurons (12), a highly dramatic event, as neurons have a very  
465 poor capacity to regenerate. Neuronal death may occur either in direct or indirect manners, such  
466 as, in the latter case, by inducing secretion of neurotoxic proteins by resident glial cells or  
467 recruitment of peripheral inflammatory cells to the brain parenchyma (11,14). Involvement of  
468 T cells in neuronal death cannot be explored in our model. However, it has to be noted that  
469 chemokines such as CXCL10, CCL5 and CXCL11, which have been shown to be over-  
470 expressed in the cerebrospinal fluid of human patients infected with TBEV (61–63), are highly  
471 up-regulated by both human neurons and astrocytes, revealing that the two cell types may  
472 participate in chemo-attraction of T cells into TBEV-infected human brain parenchyma. Similar  
473 to the observation made for PRRs and ISGs, their overexpression was, however, stronger in

474 astrocytes than in neurons, showing that astrocytes may be a major player in this process as  
475 well. As for neuronal death due to direct infection by TBEV, it has not yet been demonstrated,  
476 although ultrastructural changes in response to TBEV infection have been observed (64,65). In  
477 our human neuronal/glial and enriched neuron cultures, neuronal death occurred in the absence  
478 of peripheral cells and was associated with infection of a large proportion of neurons, showing  
479 that the virus is directly responsible for their death. This is likely to play an important role in  
480 the human brain upon infection with TBEV and most probably other flaviviruses, since similar  
481 conclusions have been drawn for West Nile virus in studies performed in primary murine  
482 neurons (66). Reactive astrocytes, however, may also influence neuronal death. Astrogliosis,  
483 indeed, occurs following brain trauma of diverse etiology (67), including infection by TBEV  
484 or the related Langat virus infection (12), and may be either beneficial or detrimental to neurons  
485 (68). In human neuronal/glial cultures, we have observed that astrocytes were hypertrophic, a  
486 classical feature of reactive astrocytes and, when neurons were deprived of astrocytes, they  
487 were more sensitive to TBEV infection, showing that astrocytes exerted, under these conditions,  
488 a neuroprotective effect, possibly via restriction of neuronal infection as previously discussed.  
489 Thus, the intensity of neuronal death depends not only on direct infection of neurons but also  
490 on the indirect effect mediated by reactive astrocytes. Proliferation sometimes accompanied  
491 astrocyte hypertrophy in astrogliosis. Surprisingly, in our experiments, we observed a decrease  
492 in the number of astrocytes by 7 days following infection, which strongly suggested that TBEV  
493 induced astrocytic death. This is in apparent contradiction with previous work showing that  
494 astrocyte viability was unaffected in rodent and human astrocyte monocultures (46,47). The  
495 difference in our results may be due to differential conditions of infection, such as viral strain  
496 or infectious dose or to the presence of neurons in our co-cultures, which may lead to astrocyte  
497 death by an unknown mechanism. Of note, infection with TBEV is not always correlated to cell  
498 death, since as many as 60 % of oligodendrocytes were infected without impact on their

499 viability. Why certain cell types die upon TBEV infection while others do not remains to be  
500 understood, as do the molecular pathways that lead to cell death. Interestingly, our findings  
501 suggest that neuronal death may result from axonal pathology and retrograde degeneration.  
502 Indeed, we showed that loss of neurites preceded the disappearance of neuronal cell bodies, an  
503 observation that is in agreement with previous work in which accumulation of viral protein in  
504 neuritic extensions and dendritic degeneration due to local replication of TBEV was evidenced  
505 in murine neurons (64). The relative contribution of axonal degeneration, which is known to  
506 play a pathogenic role in rabies virus infection (69) and in some neurodegenerative diseases  
507 (70), to TBEV-induced neuronal death need to be defined in future studies.

508         Until recently, the lack of relevant *in vitro* models virtually precluded meaningful study  
509 of viral pathogenesis in the human brain. This obstacle has been overcome by the development  
510 of methodologies providing an unlimited source of human neural cell types that can be used for  
511 disease modeling. In this study, we set up a new, complex and highly relevant *in vitro* model  
512 that mimics the major events of TBEV infection in the human brain. Using this model, we  
513 evidenced differential innate immune responses in human neurons and astrocytes that  
514 contribute to shaping TBEV tropism and neuro-pathogenesis. Based on our results, we propose  
515 a model for interactions between TBEV and human brain cells that is represented in fig 9. Our  
516 study thus advances understanding of the mechanisms involved in TBEV-induced damage of  
517 the human brain and provides a pathological model that can be used in the future to provide  
518 greater knowledge as well as to develop new therapies by screening for antiviral or  
519 neuroprotective drugs.

520

521

## 522 **Material and methods**

### 523 **Ethics statement**

524 Human fetuses were obtained after legal abortion with written informed consent from the  
525 patient. The procedure for the procurement and use of human fetal central nervous system tissue  
526 was approved and monitored by the “Comité Consultatif de Protection des Personnes dans la  
527 Recherche Biomédicale” of Henri Mondor Hospital, France. The cells are declared at the  
528 “Centre de Ressources Biologiques” of the University Hospital in Angers BB-0033-00038 with  
529 reference numbers at the Research Ministry: declaration N° DC-2011-1467; authorization N°  
530 AC-2012-1507.

531

### 532 **Culture of human neural progenitor cells**

533 Human neural progenitor cells (hNPCs) were prepared and cultured as previously described in  
534 (28,29)

535

### 536 **Neuronal and glial differentiation**

537 hNPCs were seeded on matrigel-coated plates at a density of 30 000 cells/cm<sup>2</sup>. Differentiation  
538 to a mixed population of neuronal and glial cells was induced 24 h after plating by replacing  
539 N2A medium with 1:1 N2A and NBC media (N2A: advanced Dulbecco’smodified Eigel  
540 medium-F12 supplemented with 2mM L-glutamine, 0.1mg/ml apotransferrin, 25µg/ml insulin  
541 and 6.3ng/ml progesterone. NBC: Neurobasal medium supplemented with 2mM L-glutamine  
542 and B27 without vitamin A 1X - Invitrogen, Life Technologies) and withdrawing EGF (TEBU,  
543 France) and bFGF (TEBU, France). Differentiation conditions were maintained for 13 days

544 with medium replacement twice a week, prior to infection. Twenty-four-well plates (IBIDI,  
545 #82406) were used for fluorescent immunostaining and 6-well plates (Falcon) were used to  
546 prepare lysates for RNA analyses.

547

## 548 **Virus and infection**

549 TBEV Hypr strain was a kind gift from Dr S. Moutailler (Maisons-Alfort, France). The strain  
550 was isolated in 1953 from the blood of a 10-year-old child in the Czech Republic and the  
551 complete sequence was published in (71). A working stock was generated in VERO cells  
552 (VERO-ATCC-CCL81) cultured in MEM medium (ThermoFisher) supplemented with 2%  
553 fetal bovine serum (FBS). Titer was estimated by plaque assay on VERO cells. Neuronal/glial  
554 cells differentiated for 13 days were infected with the virus (MOI  $10^{-2}$ ) for 1h at 37°C. The  
555 inoculum was removed and cells were incubated in fresh N2A-NBC medium. Virus titers were  
556 estimated by endpoint dilution on VERO cells (TCID<sub>50</sub>).

557

## 558 **RNA isolation and qPCR**

559 RNA was isolated from infected and non-infected neuronal/glial co-cultures. Cells were lysed  
560 using the *NucleoMag® 96 RNA* kit (Macherey Nagel) and RNA was extracted with a *King*  
561 *Fisher Duo* automat (Fisher Scientific) following the manufacturer's instructions. Extraction of  
562 viral RNA from supernatants of infected cells was performed using *QIAamp Viral RNA Mini*  
563 *Kit* (Qiagen) according to the manufacturer's instructions. One hundred and sixty ng (Fig. 5) or  
564 250 ng (Fig. 7) of RNA were used to synthesize cDNA with the *SuperScript™ II Reverse*  
565 *Transcriptase* kit (ThermoFisher Scientific). Real-time PCR was performed using 2µl of cDNA  
566 and *QuantiTect SYBR green PCR master* (Qiagen) with a LightCycler 96 instrument (Roche



567 Applied Science), for a total volume of 20 $\mu$ l of reaction mixture. For relative quantification, the  
568  $-2\Delta\Delta C_t$  method was used (72). The references genes were *GAPDH* or *HPRT1*. Primers pairs  
569 are listed in Supplementary table 1.

570

### 571 **RT<sup>2</sup> profiler PCR array**

572 Equal volumes of RNA from biological triplicates were pooled for each condition. Two hundred  
573 to 500 ng of RNA were transcribed with the *RT<sup>2</sup> First Strand Kit* (SA Biosciences, Qiagen).  
574 Synthesized cDNA was subjected to a PCR array specific for the human antiviral response  
575 (*RT<sup>2</sup> Profiler PCR array* – PAHS-122Z, SA Biosciences, Qiagen), according to the  
576 manufacturer's instructions. Data were normalized using the *HPRT1* house-keeping gene and  
577 analyzed with the  $-2\Delta\Delta C_t$  method for relative quantification. According to the manufacturer's  
578 instructions, an arbitrary cut-off of 3 was applied to determine significant differences. The  
579 analysis was performed using the Qiagen Data analysis center  
580 (<http://www.qiagen.com/fr/shop/genes-and-pathways/data-analysis-center-overview-page/>).

581

### 582 **Immunofluorescence assays and cell enumeration**

583 Neuronal/glial cells were fixed for 20 minutes in 4% paraformaldehyde in PBS (Electron  
584 Microscopy Sciences) and standard immunofluorescence was performed using antibodies for  
585 HuC/HuD (Thermofisher #A21271),  $\beta$ III-tubulin (Sigma #T8660), GFAP (Dako #M076101-2  
586 or #Z033429-2), OLIG2 (R&D Systems #AF2418) and TBEV-E3. Cells were blocked for 1h  
587 in 3% BSA (Sigma), 0.3% Triton-X-100 (VWR) in PBS 1X and primary antibodies were  
588 incubated in 1% BSA, 0.1% Triton-X-100 in PBS 1X overnight at +4°C. Secondary antibodies  
589 were Alexa Fluor-488/546-conjugated anti-mouse/anti-rabbit IgG (Molecular Probes,

590 Invitrogen). Nuclei were stained with 4', 6-diamidino-2-phenylindole (DAPI) (Life  
591 Technologies) at 0.1 ng/ml. Cell sub-types and infected cells were enumerated either manually  
592 or automatically. For manual cell quantification (cells immunostained with antibodies directed  
593 against  $\beta$ III-tubulin and GFAP), images were acquired with an *AxioObserver Z1* (Zeiss)  
594 inverted microscope using ZEN software (Zeiss) and analyzed using ImageJ 1.49m software.  
595 For automated quantification (cells immunostained with antibodies directed against HuC/HuD,  
596 TBEV-E3 and OLIG2 or neurites immunostained with an antibody against  $\beta$ III-tubulin), images  
597 were acquired using the Cellomics ArrayScan automated microscope (Thermofisher Scientific)  
598 and analyzed using “Colocalization” or “Neuronal profiling” bio-applications on HCS Studio  
599 Cell Analysis Software V6.6.0 (Thermofisher Scientific). In all experiments, an average of 1200  
600 (manual quantification) or 5000 (automated quantification) cells per well were enumerated. The  
601 digitized images shown were adjusted for brightness and contrast using ImageJ, without further  
602 alteration.

603

#### 604 **Magnetic-activated cell sorting**

605 Neuronal/glial cells differentiated for 13 days were detached using Gibco™ TrypLE™ Select  
606 Enzyme (1X) and collected into N2A-NBC medium. After centrifugation at 80g for 10 minutes,  
607 cells were either sub-cultured (Uns-C) or supplemented with kynurenic acid buffer and sorted  
608 according the manufacturer’s instructions using the Microbead Kit (Miltenyi Biotec #130-095-  
609 826). In brief, resuspended cells were incubated 10 minutes at 4°C with 20 $\mu$ l biotin-conjugated  
610 anti-GLAST (ACSA-1) antibodies per 10<sup>7</sup> cells, washed and incubated with anti-biotin  
611 MicroBeads for 15 minutes at 4°C. Cell sorting was performed using MS columns (Miltenyi  
612 Biotec, #130-042-201) placed in a MiniMACS™ separator (Miltenyi Biotec #130-090-312).  
613 The cell fractions found in the flow-through or bound to beads were composed of enriched

614 neurons (En-N) and enriched astrocytes (En-As), respectively. Both sorted and unsorted cells  
615 were seeded at a density of 100 000 cells per cm<sup>2</sup> on 24-well  $\mu$ -plates (IBIDI, #82406) in N2A-  
616 NBC or conditioned medium (1:1, fresh N2A-NBC: supernatant of non-infected co-cultures  
617 differentiated for 13 days, conditioned for 48h). Conditioned medium allowed neuronal survival  
618 in En-N cultures. Half of the medium was replaced every other day.

619

## 620 **Statistical analyses**

621 Data are represented as mean  $\pm$  standard deviation (SD). Statistical analyses were performed  
622 with GraphPad Prism V4.03 or V6.0.1 using an unpaired Student's t test or a one-way ANOVA  
623 analysis (Bonferroni's Multiple Comparison Test), \*=(p<0,05), \*\*=(p<0,01), \*\*\*=(p<0,001),  
624 non-significant (ns)= (p>0,05).

625

626

## 627 **Acknowledgments**

628 We are most grateful to Dr S Moutailler for providing the TBEV-Hypr strain. We deeply thank  
629 Drs PE Ceccaldi and T Couderc for sharing their insight and Dr N Jouvenet for critical reading  
630 of the manuscript.

631

## 632 **References**

633 1. Dumpis U, Crook D, Oksi J. Tick-borne encephalitis. Clin Infect Dis Off Publ Infect Dis Soc Am. avr  
634 1999;28(4):882-90.

- 635 2. Růžek D, Dobler G, Donoso Mantke O. Tick-borne encephalitis: pathogenesis and clinical  
636 implications. *Travel Med Infect Dis.* juill 2010;8(4):223-32.
- 637 3. Caracciolo I, Bassetti M, Paladini G, Luzzati R, Santon D, Merelli M, et al. Persistent viremia and urine  
638 shedding of tick-borne encephalitis virus in an infected immunosuppressed patient from a new  
639 epidemic cluster in North-Eastern Italy. *J Clin Virol Off Publ Pan Am Soc Clin Virol.* août  
640 2015;69:48-51.
- 641 4. Heinz FX, Holzmann H, Essl A, Kundi M. Field effectiveness of vaccination against tick-borne  
642 encephalitis. *Vaccine.* 23 oct 2007;25(43):7559-67.
- 643 5. Donoso Mantke O, Escadafal C, Niedrig M, Pfeffer M, Working Group For Tick-Borne Encephalitis  
644 Virus C. Tick-borne encephalitis in Europe, 2007 to 2009. *Euro Surveill Bull Eur Sur Mal Transm Eur*  
645 *Commun Dis Bull.* 29 sept 2011;16(39).
- 646 6. Ruzek D, Avšič Županc T, Borde J, Chrdele A, Eyer L, Karganova G, et al. Tick-borne encephalitis in  
647 Europe and Russia: Review of pathogenesis, clinical features, therapy, and vaccines. *Antiviral Res.*  
648 avr 2019;164:23-51.
- 649 7. Balogh Z, Ferenczi E, Szeles K, Stefanoff P, Gut W, Szomor KN, et al. Tick-borne encephalitis outbreak  
650 in Hungary due to consumption of raw goat milk. *J Virol Methods.* févr 2010;163(2):481-5.
- 651 8. Brockmann SO, Oehme R, Buckenmaier T, Beer M, Jeffery-Smith A, Spannenkrebs M, et al. A cluster  
652 of two human cases of tick-borne encephalitis (TBE) transmitted by unpasteurised goat milk and  
653 cheese in Germany, May 2016. *Euro Surveill Bull Eur Sur Mal Transm Eur Commun Dis Bull.* avr  
654 2018;23(15).
- 655 9. Dorko E, Hockicko J, Rimárová K, Bušová A, Popadák P, Popadáková J, et al. Milk outbreaks of tick-  
656 borne encephalitis in Slovakia, 2012-2016. *Cent Eur J Public Health.* déc 2018;26 Suppl:S47-50.
- 657 10. Růžek D, Salát J, Singh SK, Kopecký J. Breakdown of the blood-brain barrier during tick-borne  
658 encephalitis in mice is not dependent on CD8+ T-cells. *PLoS One.* 2011;6(5):e20472.
- 659 11. Gelpi E, Preusser M, Laggner U, Garzuly F, Holzmann H, Heinz FX, et al. Inflammatory response in  
660 human tick-borne encephalitis: analysis of postmortem brain tissue. *J Neurovirol.* août  
661 2006;12(4):322-7.
- 662 12. Gelpi E, Preusser M, Garzuly F, Holzmann H, Heinz FX, Budka H. Visualization of Central European  
663 tick-borne encephalitis infection in fatal human cases. *J Neuropathol Exp Neurol.* juin  
664 2005;64(6):506-12.
- 665 13. Hayasaka D, Nagata N, Fujii Y, Hasegawa H, Sata T, Suzuki R, et al. Mortality following peripheral  
666 infection with tick-borne encephalitis virus results from a combination of central nervous system  
667 pathology, systemic inflammatory and stress responses. *Virology.* 20 juill 2009;390(1):139-50.
- 668 14. Růžek D, Salát J, Palus M, Gritsun TS, Gould EA, Dyková I, et al. CD8+ T-cells mediate  
669 immunopathology in tick-borne encephalitis. *Virology.* 5 févr 2009;384(1):1-6.
- 670 15. Lazear HM, Pinto AK, Vogt MR, Gale M, Diamond MS. Beta interferon controls West Nile virus  
671 infection and pathogenesis in mice. *J Virol.* juill 2011;85(14):7186-94.
- 672 16. Stetson DB, Medzhitov R. Antiviral defense: interferons and beyond. *J Exp Med.* 7 août  
673 2006;203(8):1837-41.

- 674 17. Takeuchi O, Akira S. Innate immunity to virus infection. *Immunol Rev.* janv 2009;227(1):75-86.
- 675 18. González-Navajas JM, Lee J, David M, Raz E. Immunomodulatory functions of type I interferons. *Nat*  
676 *Rev Immunol.* 6 janv 2012;12(2):125-35.
- 677 19. Cho H, Prohl SC, Szretter KJ, Katze MG, Gale M, Diamond MS. Differential innate immune response  
678 programs in neuronal subtypes determine susceptibility to infection in the brain by positive-  
679 stranded RNA viruses. *Nat Med.* avr 2013;19(4):458-64.
- 680 20. Delhaye S, Paul S, Blakqori G, Minet M, Weber F, Staeheli P, et al. Neurons produce type I interferon  
681 during viral encephalitis. *Proc Natl Acad Sci U S A.* 16 mai 2006;103(20):7835-40.
- 682 21. Detje CN, Lienenklaus S, Chhatbar C, Spanier J, Prajeeth CK, Soldner C, et al. Upon intranasal  
683 vesicular stomatitis virus infection, astrocytes in the olfactory bulb are important interferon Beta  
684 producers that protect from lethal encephalitis. *J Virol.* mars 2015;89(5):2731-8.
- 685 22. Hou Y-J, Banerjee R, Thomas B, Nathan C, García-Sastre A, Ding A, et al. SARM is required for  
686 neuronal injury and cytokine production in response to central nervous system viral infection. *J*  
687 *Immunol Baltim Md 1950.* 15 juill 2013;191(2):875-83.
- 688 23. Schultz KLW, Vernon PS, Griffin DE. Differentiation of neurons restricts Arbovirus replication and  
689 increases expression of the alpha isoform of IRF-7. *J Virol.* janv 2015;89(1):48-60.
- 690 24. Weber E, Finsterbusch K, Lindquist R, Nair S, Lienenklaus S, Gekara NO, et al. Type I interferon  
691 protects mice from fatal neurotropic infection with Langkat virus by systemic and local antiviral  
692 responses. *J Virol.* nov 2014;88(21):12202-12.
- 693 25. Mestas J, Hughes CCW. Of mice and not men: differences between mouse and human immunology.  
694 *J Immunol Baltim Md 1950.* 1 mars 2004;172(5):2731-8.
- 695 26. Shaw AE, Hughes J, Gu Q, Behdenna A, Singer JB, Dennis T, et al. Fundamental properties of the  
696 mammalian innate immune system revealed by multispecies comparison of type I interferon  
697 responses. *PLoS Biol.* 2017;15(12):e2004086.
- 698 27. Lafaille FG, Ciancanelli MJ, Studer L, Smith G, Notarangelo L, Casanova J-L, et al. Deciphering Human  
699 Cell-Autonomous Anti-HSV-1 Immunity in the Central Nervous System. *Front Immunol.* 2015;6:208.
- 700 28. Brnic D, Stevanovic V, Cochet M, Agier C, Richardson J, Montero-Menei CN, et al. Borna disease  
701 virus infects human neural progenitor cells and impairs neurogenesis. *J Virol.* mars 2012;86(5):2512  
702 -22.
- 703 29. Scordel C, Huttin A, Cochet-Bernoin M, Szelechowski M, Poulet A, Richardson J, et al. Borna disease  
704 virus phosphoprotein impairs the developmental program controlling neurogenesis and reduces  
705 human GABAergic neurogenesis. *PLoS Pathog.* avr 2015;11(4):e1004859.
- 706 30. Richardson RB, Ohlson MB, Eitson JL, Kumar A, McDougal MB, Boys IN, et al. A CRISPR screen  
707 identifies IFI6 as an ER-resident interferon effector that blocks flavivirus replication. *Nat Microbiol.*  
708 2018;3(11):1214-23.
- 709 31. Farina C, Aloisi F, Meinl E. Astrocytes are active players in cerebral innate immunity. *Trends*  
710 *Immunol.* mars 2007;28(3):138-45.
- 711 32. Bsibsi M, Ravid R, Gveric D, van Noort JM. Broad expression of Toll-like receptors in the human  
712 central nervous system. *J Neuropathol Exp Neurol.* nov 2002;61(11):1013-21.

- 713 33. Panayiotou C, Lindqvist R, Kurhade C, Vonderstein K, Pasto J, Edlund K, et al. Viperin Restricts Zika  
714 Virus and Tick-Borne Encephalitis Virus Replication by Targeting NS3 for Proteasomal Degradation. *J*  
715 *Virology*. 01 2018;92(7).
- 716 34. Upadhyay AS, Vonderstein K, Pichlmair A, Stehling O, Bennett KL, Dobler G, et al. Viperin is an iron-  
717 sulfur protein that inhibits genome synthesis of tick-borne encephalitis virus via radical SAM domain  
718 activity. *Cell Microbiol*. juin 2014;16(6):834-48.
- 719 35. Lin C-C, Wu Y-J, Heimrich B, Schwemmler M. Absence of a robust innate immune response in rat  
720 neurons facilitates persistent infection of Borna disease virus in neuronal tissue. *Cell Mol Life Sci*  
721 *CMLS*. nov 2013;70(22):4399-410.
- 722 36. Ferraris P, Cochet M, Hamel R, Gladwyn-Ng I, Alfano C, Diop F, et al. Zika virus differentially infects  
723 human neural progenitor cells according to their state of differentiation and dysregulates  
724 neurogenesis through the Notch pathway. *Emerg Microbes Infect*. 2019;8(1):1003-16.
- 725 37. Retallack H, Di Lullo E, Arias C, Knopp KA, Laurie MT, Sandoval-Espinosa C, et al. Zika virus cell  
726 tropism in the developing human brain and inhibition by azithromycin. *Proc Natl Acad Sci U S A*. 13  
727 2016;113(50):14408-13.
- 728 38. Cosenza MA, Zhao M-L, Si Q, Lee SC. Human brain parenchymal microglia express CD14 and CD45  
729 and are productively infected by HIV-1 in HIV-1 encephalitis. *Brain Pathol Zurich Switz*. oct  
730 2002;12(4):442-55.
- 731 39. Aksamit AJ, Sever JL, Major EO. Progressive multifocal leukoencephalopathy: JC virus detection by in  
732 situ hybridization compared with immunohistochemistry. *Neurology*. avr 1986;36(4):499-504.
- 733 40. Kapil P, Butchi NB, Stohlman SA, Bergmann CC. Oligodendroglia are limited in type I interferon  
734 induction and responsiveness in vivo. *Glia*. oct 2012;60(10):1555-66.
- 735 41. Guarner J, Shieh W-J, Hunter S, Paddock CD, Morken T, Campbell GL, et al. Clinicopathologic study  
736 and laboratory diagnosis of 23 cases with West Nile virus encephalomyelitis. *Hum Pathol*. août  
737 2004;35(8):983-90.
- 738 42. Iwasaki Y, Zhao JX, Yamamoto T, Konno H. Immunohistochemical demonstration of viral antigens in  
739 Japanese encephalitis. *Acta Neuropathol (Berl)*. 1986;70(1):79-81.
- 740 43. Kimura-Kuroda J, Ichikawa M, Ogata A, Nagashima K, Yasui K. Specific tropism of Japanese  
741 encephalitis virus for developing neurons in primary rat brain culture. *Arch Virol*. 1993;130(3-4):477  
742 -84.
- 743 44. Kurhade C, Zegenhagen L, Weber E, Nair S, Michaelsen-Preusse K, Spanier J, et al. Type I Interferon  
744 response in olfactory bulb, the site of tick-borne flavivirus accumulation, is primarily regulated by  
745 IPS-1. *J Neuroinflammation*. 27 janv 2016;13:22.
- 746 45. Lindqvist R, Mundt F, Gilthorpe JD, Wölfel S, Gekara NO, Kröger A, et al. Fast type I interferon  
747 response protects astrocytes from flavivirus infection and virus-induced cytopathic effects. *J*  
748 *Neuroinflammation*. 24 2016;13(1):277.
- 749 46. Palus M, Bílý T, Elsterová J, Langhansová H, Salát J, Vancová M, et al. Infection and injury of human  
750 astrocytes by tick-borne encephalitis virus. *J Gen Virol*. nov 2014;95(Pt 11):2411-26.
- 751 47. Potokar M, Korva M, Jorgačevski J, Avšič-Županc T, Zorec R. Tick-borne encephalitis virus infects rat  
752 astrocytes but does not affect their viability. *PloS One*. 2014;9(1):e86219.

- 753 48. Desai A, Shankar SK, Ravi V, Chandramuki A, Gourie-Devi M. Japanese encephalitis virus antigen in  
754 the human brain and its topographic distribution. *Acta Neuropathol (Berl)*. 1995;89(4):368-73.
- 755 49. German AC, Myint KSA, Mai NTH, Pomeroy I, Phu NH, Tzartos J, et al. A preliminary  
756 neuropathological study of Japanese encephalitis in humans and a mouse model. *Trans R Soc Trop  
757 Med Hyg*. déc 2006;100(12):1135-45.
- 758 50. Sips GJ, Wilschut J, Smit JM. Neuroinvasive flavivirus infections. *Rev Med Virol*. mars 2012;22(2):69-  
759 87.
- 760 51. Yokoo H, Nobusawa S, Takebayashi H, Ikenaka K, Isoda K, Kamiya M, et al. Anti-human Olig2  
761 antibody as a useful immunohistochemical marker of normal oligodendrocytes and gliomas. *Am J  
762 Pathol*. mai 2004;164(5):1717-25.
- 763 52. Durrant DM, Ghosh S, Klein RS. The Olfactory Bulb: An Immunosensory Effector Organ during  
764 Neurotropic Viral Infections. *ACS Chem Neurosci*. 20 avr 2016;7(4):464-9.
- 765 53. Lucas-Hourani M, Munier-Lehmann H, Helynck O, Komarova A, Desprès P, Tangy F, et al. High-  
766 throughput screening for broad-spectrum chemical inhibitors of RNA viruses. *J Vis Exp JoVE*.  
767 2014;(87).
- 768 54. Welsch JC, Charvet B, Dussurgey S, Allatif O, Aurine N, Horvat B, et al. Type I Interferon Receptor  
769 Signaling Drives Selective Permissiveness of Astrocytes and Microglia to Measles Virus during Brain  
770 Infection. *J Virol*. 1 juill 2019;93(13).
- 771 55. Lindqvist R, Överby AK. The Role of Viperin in Antiflavivirus Responses. *DNA Cell Biol*. sept  
772 2018;37(9):725-30.
- 773 56. Dong Y, Benveniste EN. Immune function of astrocytes. *Glia*. nov 2001;36(2):180-90.
- 774 57. Hanisch U-K. Microglia as a source and target of cytokines. *Glia*. nov 2002;40(2):140-55.
- 775 58. Madeddu S, Woods TA, Mukherjee P, Sturdevant D, Butchi NB, Peterson KE. Identification of Glial  
776 Activation Markers by Comparison of Transcriptome Changes between Astrocytes and Microglia  
777 following Innate Immune Stimulation. *PloS One*. 2015;10(7):e0127336.
- 778 59. Chakraborty S, Nazmi A, Dutta K, Basu A. Neurons under viral attack: victims or warriors?  
779 *Neurochem Int*. juin 2010;56(6-7):727-35.
- 780 60. Selinger M, Wilkie GS, Tong L, Gu Q, Schnettler E, Grubhoffer L, et al. Analysis of tick-borne  
781 encephalitis virus-induced host responses in human cells of neuronal origin and interferon-  
782 mediated protection. *J Gen Virol*. août 2017;98(8):2043-60.
- 783 61. Grygorczuk S, Zajkowska J, Swierzbińska R, Pancewicz S, Kondrusik M, Hermanowska-Szpakowicz T.  
784 [Concentration of the beta-chemokine CCL5 (RANTES) in cerebrospinal fluid in patients with tick-  
785 borne encephalitis]. *Neurol Neurochir Pol*. avr 2006;40(2):106-11.
- 786 62. Lepej SZ, Misić-Majerus L, Jeren T, Rode OD, Remenar A, Sporec V, et al. Chemokines CXCL10 and  
787 CXCL11 in the cerebrospinal fluid of patients with tick-borne encephalitis. *Acta Neurol Scand*. févr  
788 2007;115(2):109-14.
- 789 63. Zajkowska J, Moniuszko-Malinowska A, Pancewicz SA, Muszyńska-Mazur A, Kondrusik M,  
790 Grygorczuk S, et al. Evaluation of CXCL10, CXCL11, CXCL12 and CXCL13 chemokines in serum and  
791 cerebrospinal fluid in patients with tick borne encephalitis (TBE). *Adv Med Sci*. 2011;56(2):311-7.

- 792 64. Hirano M, Yoshii K, Sakai M, Hasebe R, Ichii O, Kariwa H. Tick-borne flaviviruses alter membrane  
793 structure and replicate in dendrites of primary mouse neuronal cultures. *J Gen Virol.* avr 2014;95(Pt  
794 4):849-61.
- 795 65. Bílý T, Palus M, Eyer L, Elsterová J, Vancová M, Růžek D. Electron Tomography Analysis of Tick-Borne  
796 Encephalitis Virus Infection in Human Neurons. *Sci Rep.* 15 juin 2015;5:10745.
- 797 66. Shrestha B, Gottlieb D, Diamond MS. Infection and injury of neurons by West Nile encephalitis virus.  
798 *J Virol.* déc 2003;77(24):13203-13.
- 799 67. Liddelow SA, Barres BA. Reactive Astrocytes: Production, Function, and Therapeutic Potential.  
800 *Immunity.* 20 2017;46(6):957-67.
- 801 68. Soung A, Klein RS. Viral Encephalitis and Neurologic Diseases: Focus on Astrocytes. *Trends Mol Med.*  
802 2018;24(11):950-62.
- 803 69. Li X-Q, Sarmiento L, Fu ZF. Degeneration of neuronal processes after infection with pathogenic, but  
804 not attenuated, rabies viruses. *J Virol.* août 2005;79(15):10063-8.
- 805 70. Li J-Y, Conforti L. Axonopathy in Huntington's disease. *Exp Neurol.* août 2013;246:62-71.
- 806 71. Wallner G, Mandl CW, Ecker M, Holzmann H, Stiasny K, Kunz C, et al. Characterization and complete  
807 genome sequences of high- and low- virulence variants of tick-borne encephalitis virus. *J Gen Virol.*  
808 mai 1996;77 ( Pt 5):1035-42.
- 809 72. Livak KJ, Schmittgen TD. Analysis of Relative Gene Expression Data Using Real-Time Quantitative  
810 PCR and the  $2^{-\Delta\Delta CT}$  Method. *Methods.* déc 2001;25(4):402-8.

811

## 812 **Legends**

813

### 814 **Figure 1. TBEV infects, replicates and spreads in hNPC-derived brain cells**

815 (A) Schematic representation of the experimental procedure. (B) Immunofluorescence labeling  
816 of differentiated hNPCs 24 h and 72 h following TBEV infection. An antibody directed against  
817 the domain 3 of the viral envelope (TBEV-E3, green) revealed infected cells. Nuclei were  
818 stained with DAPI (blue). (C) Enumeration of infected cells based on immunofluorescence  
819 labeling using an ArrayScan Cellomics instrument. (D) RNA from the supernatant and cell  
820 lysate of infected cells was analyzed by RT-qPCR to determine viral replication. (E)  
821 Supernatant was collected at the peak of infection and titrated by end-point dilution (TCID<sub>50</sub>)



822 on VERO cells. Results are representative of 3 independent experiments performed in  
823 triplicate. Data are expressed as the mean  $\pm$  SD. Statistical analysis was performed using one-  
824 way ANOVA (Bonferroni's Multiple Comparison Test) with Graphpad Prism V6.0.1, ns=non-  
825 significant ( $p>0.05$ ); \*\*= $p<0.01$ , \*\*\*= $p<0.001$ . Scale bar=100 $\mu$ m.

826

## 827 **Figure 2. TBEV tropism for hNPCs-derived brain cells**

828 HNPCs differentiated for 13 days were infected with TBEV-Hypr at MOI  $10^{-2}$ . (A)  
829 Immunofluorescence labeling of infected cells at 24 hpi. Antibodies against  $\beta$ III-tubulin  
830 (neurones), GFAP (astrocytes) or OLIG2 (oligodendrocytes) (green), and TBEV-E3 (red) were  
831 used. Nuclei were stained with DAPI (blue). Yellow arrows show infected neurons, astrocytes  
832 and oligodendrocytes. Oligodendrocytes were recolored from grey to green. Scale bar=20  $\mu$ m.  
833 (B) Higher magnification (digitally cropped) showing the viral envelope in perinuclear areas  
834 (arrowhead) and neurites and astrocytic outgrowths (arrows). Scale bar=20 $\mu$ m. (C-E)  
835 Percentage of infected cells based on immunofluorescence labeling during the course of  
836 infection for (C) neurons, (D) astrocytes and (E) oligodendrocytes. Results are representative  
837 of at least 2 independent experiments performed in triplicate. Data are expressed as the  
838 mean $\pm$ SD. Statistical analysis was performed using a two-tailed unpaired t test with Graphpad  
839 Prism V6.0.1, ns=non-significant ( $p>0.05$ ), \*= $p<0.05$ , \*\*= $p<0.01$ , \*\*\*= $p<0.001$ .

840

## 841 **Figure 3. TBEV damages human neurons**

842 HNPCs were differentiated for 13 days and infected with TBEV-Hypr at MOI  $10^{-2}$ . (A) Cells  
843 in non-infected (NI) and infected (TBEV) co-cultures were immunostained with an antibody  
844 directed against HuC/HuD (neurons, green) at 14 dpi. Nuclei were counterstained with DAPI.  
845 Scale bars=100 $\mu$ m. (B) Enumeration of HuC/HuD-positive cells using an ArrayScan Cellomics  
846 instrument. Normalization to non-infected HuC/HuD-positive cells at 14 hpi. (C) Cells in non-

847 infected and infected cultures were immunostained with an antibody against  $\beta$ III-tubulin  
848 (neurons, red) at 7 dpi. Note the paucity of neurites in TBEV-infected co-cultures. (D)  
849 Quantification of neurite network density (neurite length per  $\text{mm}^2$ ) using an ArrayScan  
850 Cellomics instrument. Results in (B) and (D) are expressed as the mean $\pm$ SD and are  
851 representative of four and two independent experiments performed in triplicate, respectively.  
852 Statistical analysis was performed using a two-tailed unpaired t test with Graphpad Prism  
853 V6.0.1, ns=non-significant ( $p>0.05$ ); \*= $p<0.05$ ; \*\*= $p<0.01$ ; \*\*\*= $p<0.001$ .

854

#### 855 **Figure 4. Impact of TBEV on human glial cells**

856 HNPCs were differentiated for 13 days and infected with TBEV-Hypr at MOI  $10^{-2}$ . (A) Cells  
857 in non-infected (NI) and infected (TBEV) co-cultures were immunostained with an antibody  
858 directed against GFAP (astrocytes, red) at 7 dpi. Nuclei were counterstained with DAPI. Scale  
859 bars=20 $\mu\text{m}$ . (B) Manual enumeration of GFAP-positive cells using ImageJ software.  
860 Normalization was performed relative to non-infected GFAP-positive cells at 24 hpi. (C)  
861 Immunostained cells with OLIG2 antibody were enumerated automatically. Normalization was  
862 performed relative to non-infected OLIG2-positive cells at 24 hpi. The results are expressed as  
863 the mean $\pm$ SD and are representative of two (oligodendrocytes) and three (astrocytes)  
864 independent experiments performed in triplicate. Statistical analysis was performed using a  
865 two-tailed unpaired t test with Graphpad Prism V6.0.1, ns=non-significant ( $p>0.05$ ); \*= $p<0.05$ .

866

#### 867 **Figure 5. TBEV-induced antiviral response in hNPC-derived neuronal/glial cells**

868 (A) TBEV-infected neuronal/glial cells and their matched NI controls were analyzed 24 hpi using  
869 an RT<sup>2</sup> Profiler PCR array specific for the human antiviral response. The heat map shows the  
870 differential expression of 84 analyzed human genes. The most highly up- and down-regulated genes

871 are colored in red and dark green, respectively. The blue lines indicate the arbitrary cut-off of 3.  
872 Genes between the two lines are considered non-regulated. (B-K) RT-qPCR analyses of selected  
873 antiviral genes. Gene expression was normalized to *HPRT1* gene and the  $-2\Delta\Delta C_t$  method was used  
874 for relative quantification (normalization to non-infected cells at 7 hpi). Data are expressed as the  
875 mean $\pm$ SD. Results are representative of one experiment performed on pooled triplicates (PCR  
876 array) or two independent experiments performed in triplicate (qPCRs). Statistical analysis was  
877 performed using a two-tailed unpaired t test with Graphpad Prism V6.0.1, ns=non-significant  
878 ( $p>0.05$ );  $*=p<0.05$ ;  $**=p<0.01$ ;  $***=p<0.001$ .

879

880 **Figure 6. Enrichment of human neurons and astrocytes by magnetic-activated cell sorting**

881 HNPC-derived neuronal/glial cells differentiated for 13 days were sorted using MACS  
882 technology. (A, D, F) Phase-contrast micrographs, showing Uns-C (A), En-N (D) and En-As  
883 (F), were acquired 96 h after re-seeding. Blue arrows indicate neurons and brown arrowheads  
884 indicate astrocytes. Scale bars = 50 $\mu$ m. (B, E, G). Enumeration of neurons, astrocytes and  
885 oligodendrocytes in Uns-C (B), En-N (E) and En-As (G) based on immunofluorescence staining  
886 (DAPI, antibodies against HuC/HuD and OLIG2) and using an ArrayScan Cellomics  
887 instrument. Data are representative of 4 independent experiments performed in triplicate. (C)  
888 Scatterplot of basal level of antiviral response genes in unsorted cells (Uns-C) compared with  
889 non-trypsinised cells (Co-C). Analysis was performed using an antiviral response PCR array.  
890 Genes along the black line have similar expression levels in the two cultures. Dotted lines  
891 represent an arbitrary cutoff of 3. Data are from a single experiment performed with pooled  
892 triplicates.

893

894 **Figure 7. Antiviral response in enriched neurons, enriched astrocytes and unsorted cells**

895 (A-I) Expression of antiviral genes upon TBEV infection. (A) TBEV-infected Uns-C, En-N and  
896 En-As and their matched non-infected controls were analyzed 24 hpi using an RT<sup>2</sup> profiler PCR  
897 array specific for the human antiviral response. Heat map showing the 84 human genes analyzed  
898 and their differential expression. Color code and blue line are as in figure 5. Note that genes  
899 noted (+) are above the cut-off of 3. (B-I) RT-qPCR analyses of selected antiviral response  
900 genes in En-As (red) and En-N (green). (J-N) Basal expression of antiviral genes. (J, K)  
901 Scatterplots of basal expression levels of antiviral response genes in enriched neurons (En-N)  
902 compared with that of unsorted cells (Uns-C) (J) or enriched astrocytes (En-As) (K). Analysis  
903 was performed using an antiviral response PCR array. (L-N) RT-qPCR analysis of the basal  
904 expression of IFIH1/MDA5 (L), DDX58/RIG-I (M), and OAS2 (N) genes in En-N and En-As.  
905 Gene expression was normalized to HPRT1 and the  $-2\Delta\Delta C_t$  method was used for relative  
906 quantification (normalization to non-infected En-N, at 7hpi for B-I). The results are expressed  
907 as the mean $\pm$ SD. Data are representative of two independent experiments performed in  
908 triplicate (B-I, L-N) and one experiment performed with pooled triplicates (J, K). Statistical  
909 analyses comparing En-As and En-N were performed with Graphpad Prism V6.0.1 using a two-  
910 tailed unpaired t test, ns=non-significant ( $p>0.05$ ); \*= $p<0.05$ ; \*\*= $p<0.01$ ; \*\*\*= $p<0.001$ .

911

## 912 **Figure 8 – Human astrocytes protect neurons from TBEV infection**

913 Unsorted cells (Uns-C) and enriched neurons (En-N) were infected with TBEV and co-  
914 immunostained using anti- $\beta$ III-tubulin and anti-TBEV-E3 antibodies. (A) Infected neurons  
915 among the neuronal population. Manual enumeration. The data is displayed as relative infection  
916 to Uns-C at 24 hpi. Data are expressed as the mean $\pm$ SD. (B) Immunofluorescence staining of  
917 neurons (green). Nuclei were stained with DAPI (blue). Scale bar=20 $\mu$ m. Results are

918 representative of two independent experiments performed in triplicate. Statistical analyses were  
919 performed with Graphpad Prism V6.0.1 using a two-tailed unpaired t test, \*\*= $p < 0.01$ .

920

### 921 **Figure 9 – Proposed model of interactions between TBEV and human brain cells**

922 In the human brain parenchyma, TBEV infects neurons, astrocytes and possibly  
923 oligodendrocytes (1). Both neurons and astrocytes develop an antiviral response. In neurons, it  
924 is insufficient to afford protection (2) and poorly controlled infection induces neuronal death in  
925 a direct manner (3). Astrocytes are infected but control infection, owing to their strong antiviral  
926 response (4), which may also be beneficial to neurons (5). Astrocytes enter a reactive stage (6)  
927 and some of them die (7). Both neurons and astrocytes overexpressed a high level of  
928 chemokines involved in chemo-attraction of T cells in the brain parenchyma (8), although  
929 astrocytes are stronger producers. Figure was created using Servier Medical Art available on  
930 [www.servier.com](http://www.servier.com). As, astrocytes. AV Resp, antiviral response. CMK, Chemokines. Ne,  
931 neurons.

932

933 **Table 1** – Differential expression of genes involved in the human antiviral response in unsorted  
934 cultures (Uns-C), enriched neurons (En-N) and enriched astrocytes (En-As). Up and down-  
935 regulated genes appear in bold, after application of a cut-off of 3.

936

### 937 **Supporting information legends**

938

939 **S1 Fig. Neurons and astrocytes are the major cell types in hNPCs-derived cultures.**

940 HNPCs were differentiated for 13 days. (A) Immunofluorescence labeling using antibodies  
941 against HuC/HuD, a neuronal nuclear marker (green), GFAP, an astrocytic marker (red) and  
942 OLIG2, an oligodendrocyte nuclear marker (grey) were used. Nuclei were stained with DAPI  
943 (blue). Scale bar=20  $\mu$ m. (B) Enumeration of cells based on immunofluorescence labeling.  
944 Automated quantification using an ArrayScan Cellomics instrument. (C) Enumeration of  
945 astrocytes based on immunofluorescence labeling. Manual quantification.

946

947 **S2 Fig. – Neuronal survival is not affected by TBEV infection at 24 hpi in unsorted cells**  
948 **and enriched neuron cultures.**

949 Unsorted cultures (Uns-C) and enriched neurons (En-N) were infected with TBEV and co-  
950 immunostained with  $\beta$ III-tubulin (neurons) and anti-TBEV-E3 antibodies. Manual enumeration  
951 of infected neurons was performed at 24hpi. Data are expressed as the mean $\pm$ SD and  
952 normalized to non-infected Uns-C. Results are representative of two independent experiments  
953 performed in triplicate. Statistical analysis was performed using a two-tailed unpaired t test with  
954 GraphPad Prism V6.0.1, ns=non-significant ( $p>0.05$ ).

955

956 **S1 Table - Primer pairs used for qRT-PCR analyses.**

957

959 **Supplementary Table 1. Primer pairs used for qRT-PCR analyses**

| <b>Gene name</b>   | <b>3' primer</b>       | <b>5' primer</b>         |
|--------------------|------------------------|--------------------------|
| GAPDH              | CACCATCTTCCAGGAGCGAG   | GAGATGATGACCCTTTTGGC     |
| HPRT1              | GGACTAATTATGGACAGGACTG | GCTCTTCAGTCTGATAAAATCTAC |
| TBEV               | GGGCGGTTCTTGTTCTCC     | ACACATCACCTCCTTGTCAGACT  |
| TLR3               | GCTGCAGTCAGCAACTTCAT   | AGGAAAGGCTAGCAGTCATCC    |
| DDX58<br>(RIG-I)   | GAGAAAAAGTGTGGCAGCCT   | ATATCCGGAAGACCCTGGAC     |
| IFIH1<br>(MDA5)    | TGCCCATGTTGCTGTTATGT   | GTCTGGGGCATGGAGAATAA     |
| CXCL10             | GCAGGTACAGCGTACGGTTC   | CAGCAGAGGAACCTCCAGTC     |
| CXCL11             | ATGCAAAGACAGCGTCCTCT   | CAAACATGAGTGTGAAGGGC     |
| CCL5<br>(RANTES)   | TGTACTCCCGAACCCATTTC   | TACACCAGTGGCAAGTGCTC     |
| RSAD2<br>(viperin) | GTCCCTGGCATAACAGAGACTG | GCTCAGAGGTTGCCTGAACA     |
| IFI6               | TCGCTGATGAGCTGGTCTGC   | ATTACCTATGACGACGCTGC     |
| OAS2               | TGTTTTCCGTCATAGGAGC    | CTGATCGACGAGATGGTGAA     |
| MX1                | CTACACACCGTGACGGATATG  | CGAGCTGGATTGGAAAGCCC     |
| ISG15              | CACCGTGTTTCATGAATCTGC  | CTTTATTTCCGGCCCTTGAT     |

960

961

962

**Fig.1**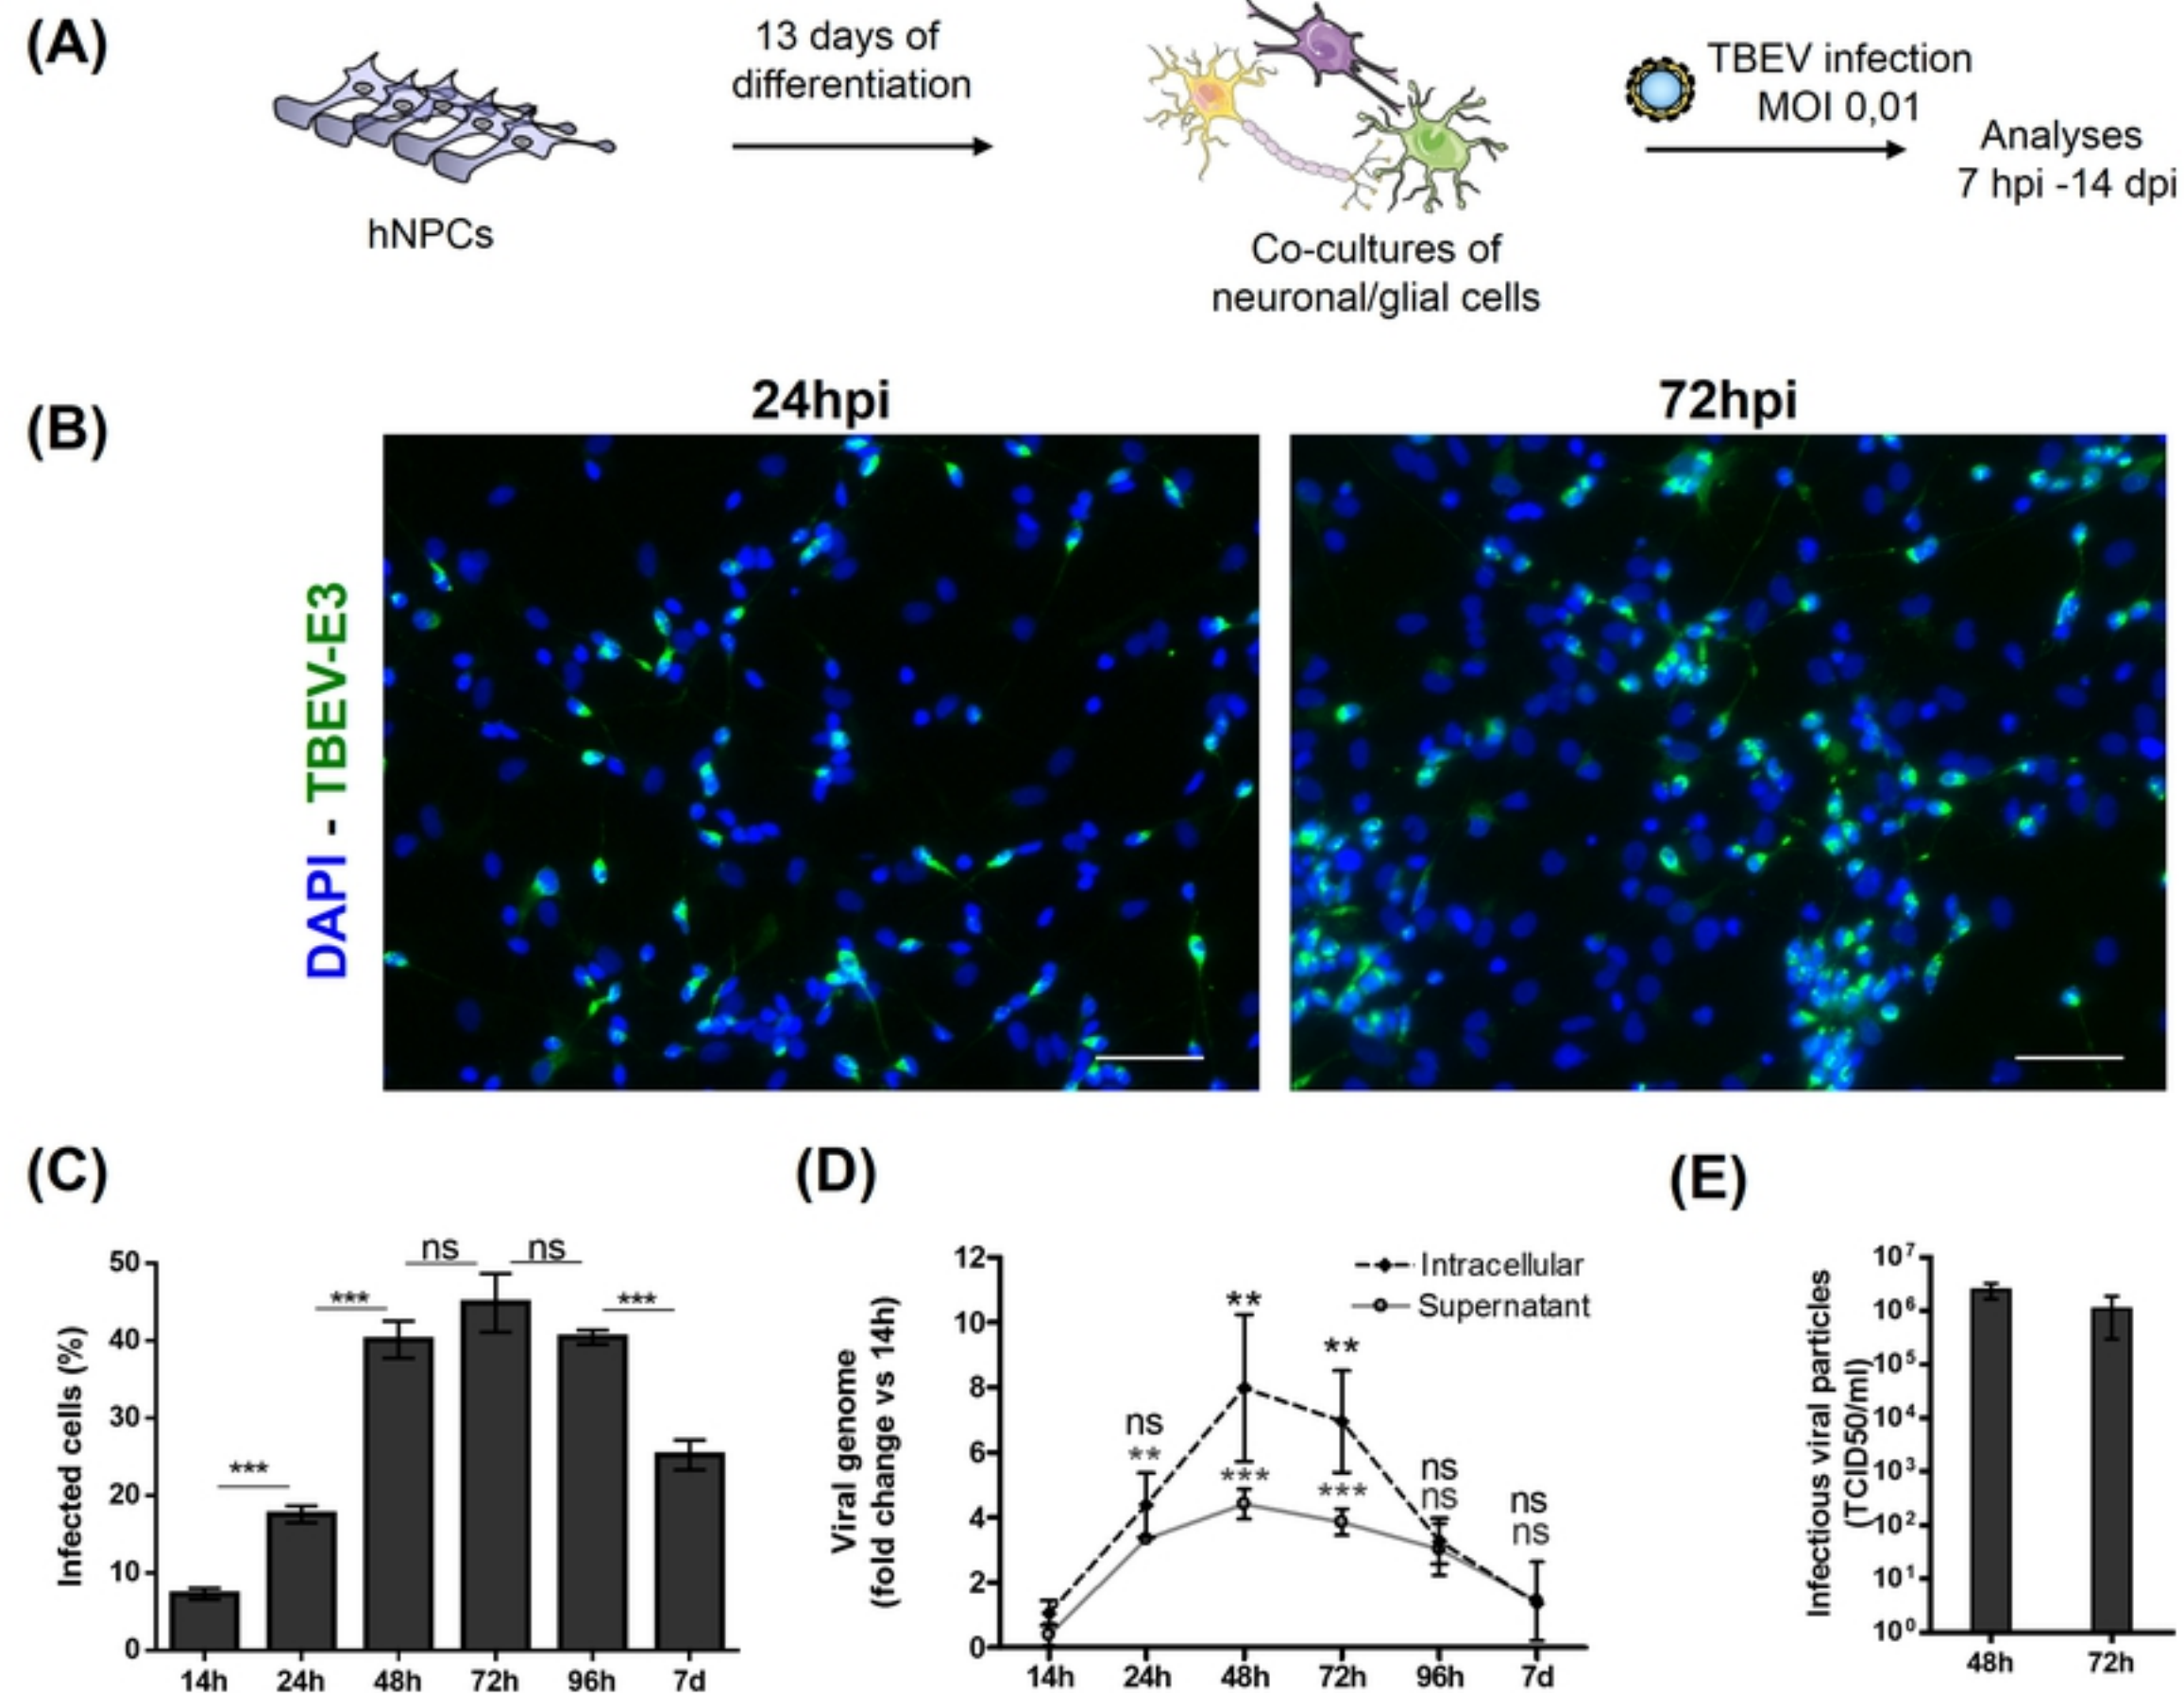**Figure 1**



Fig.2

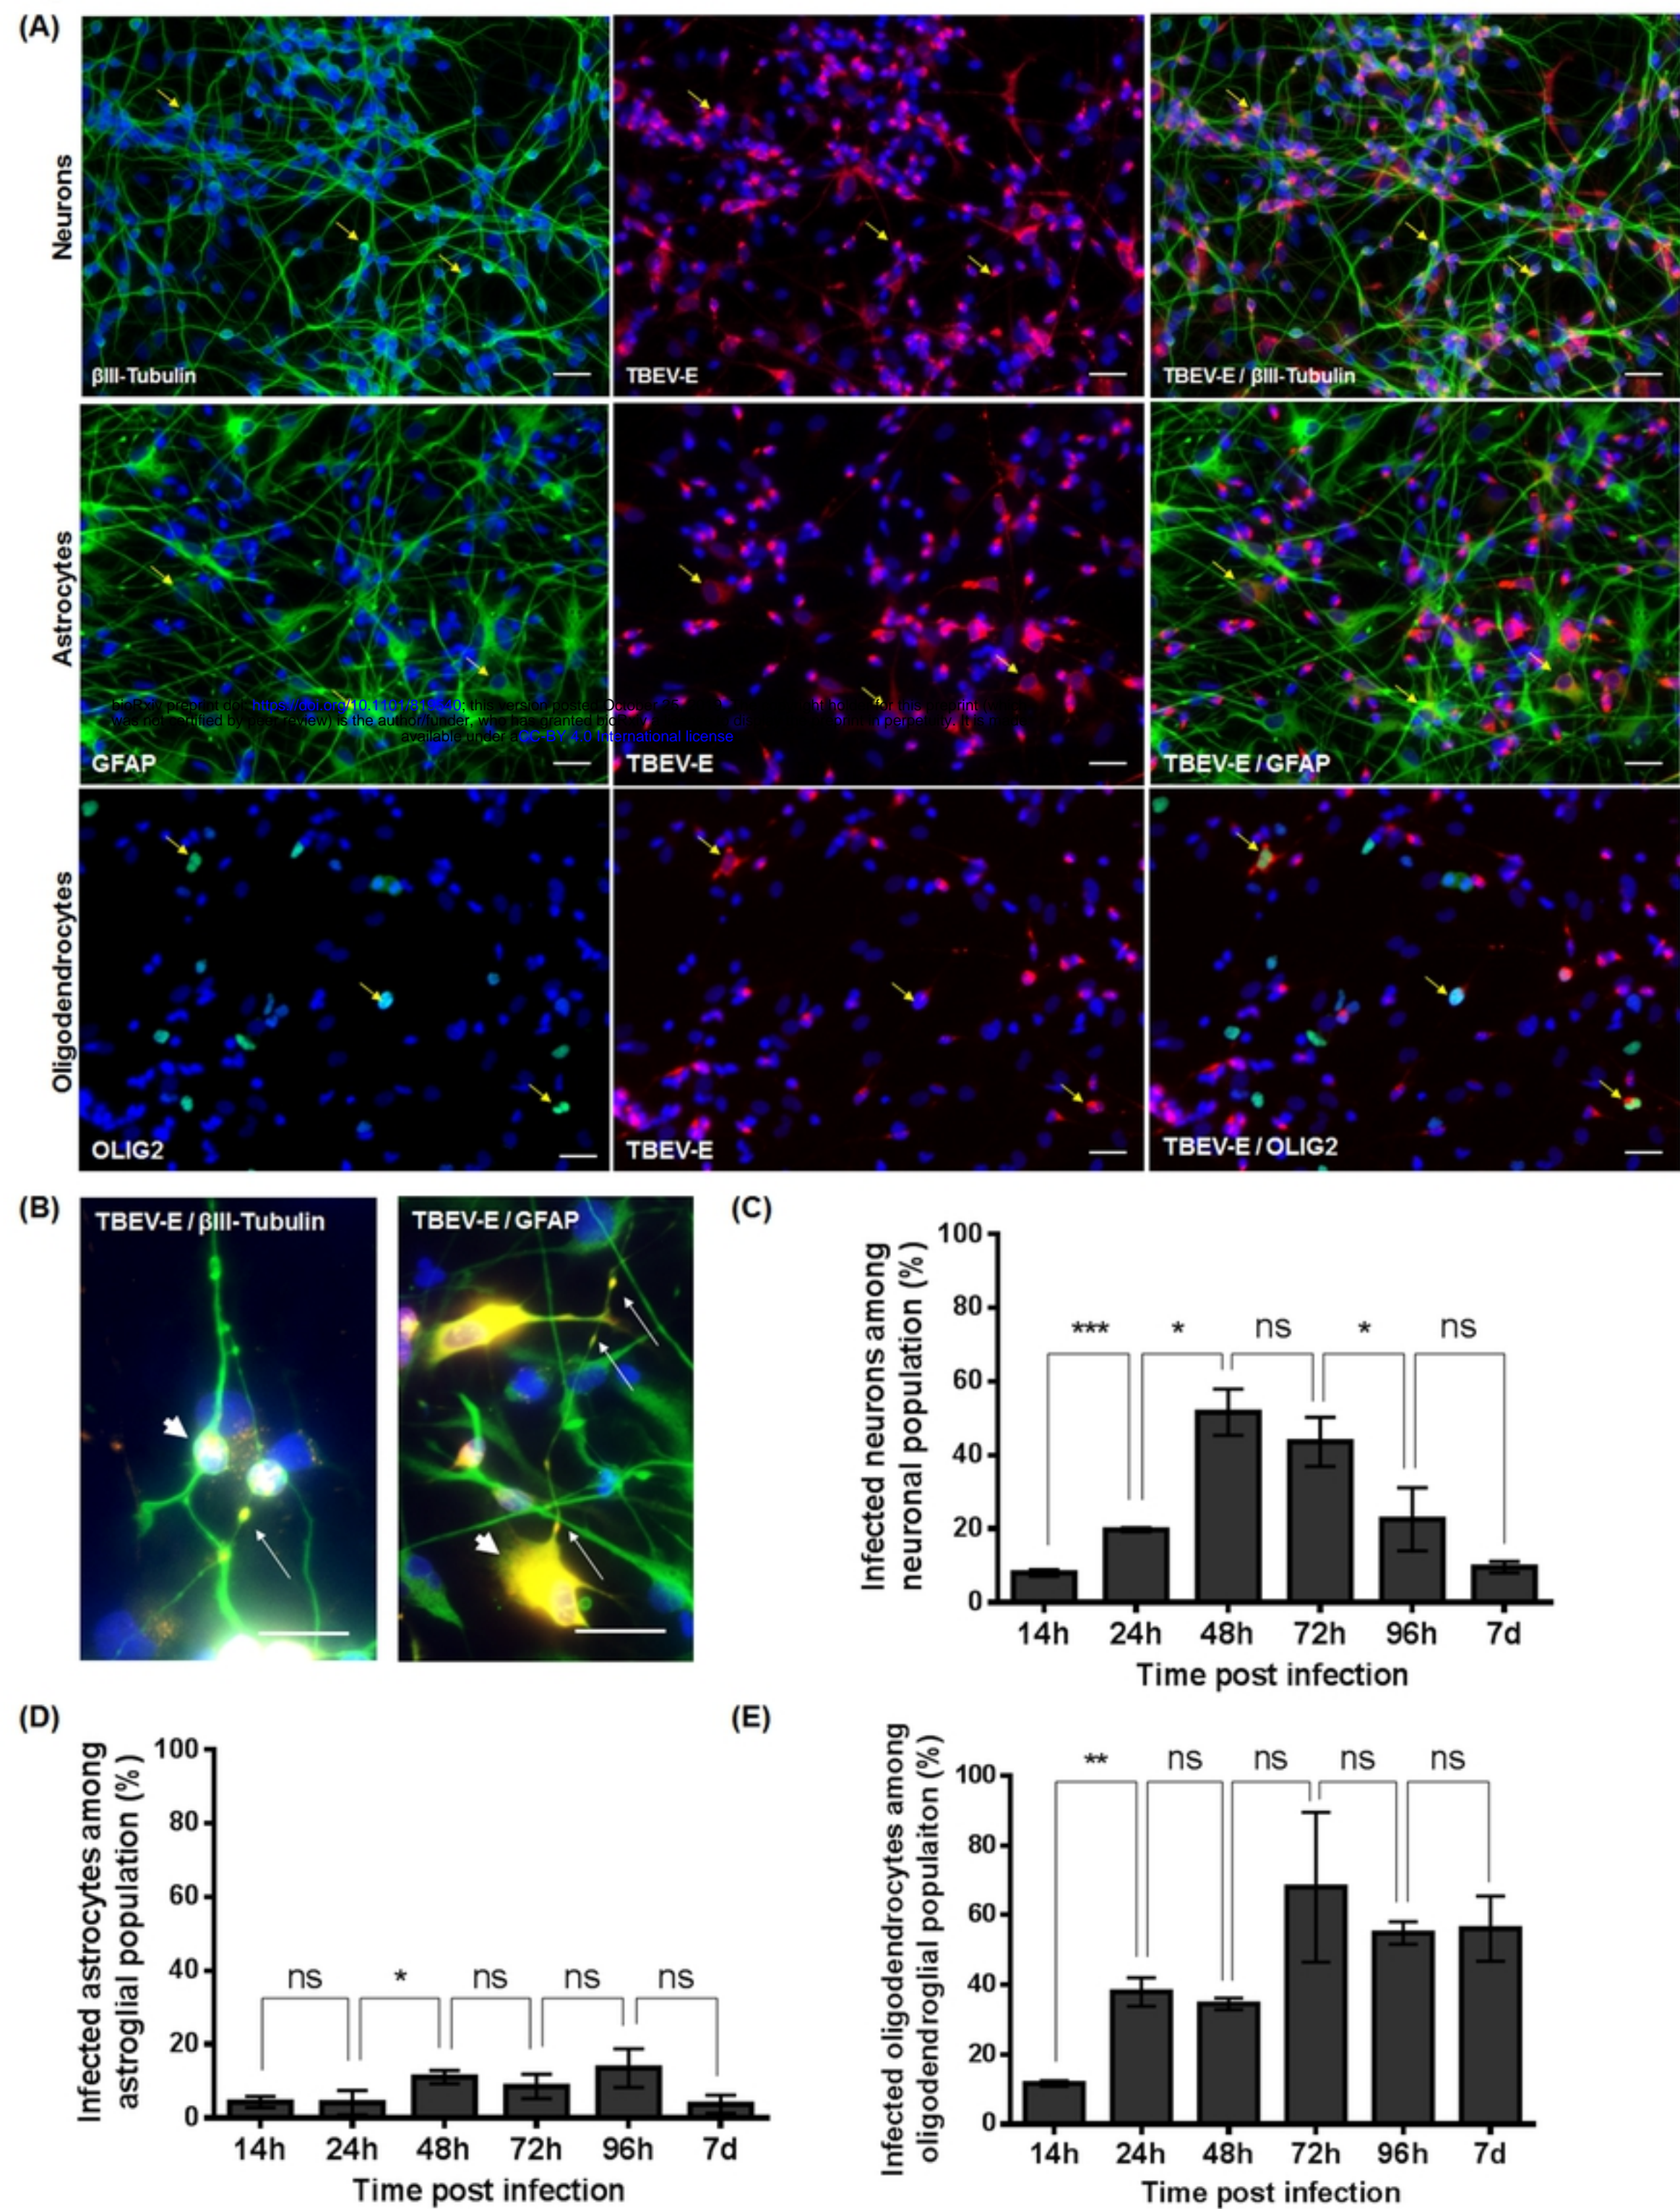

Figure 2

Fig.3

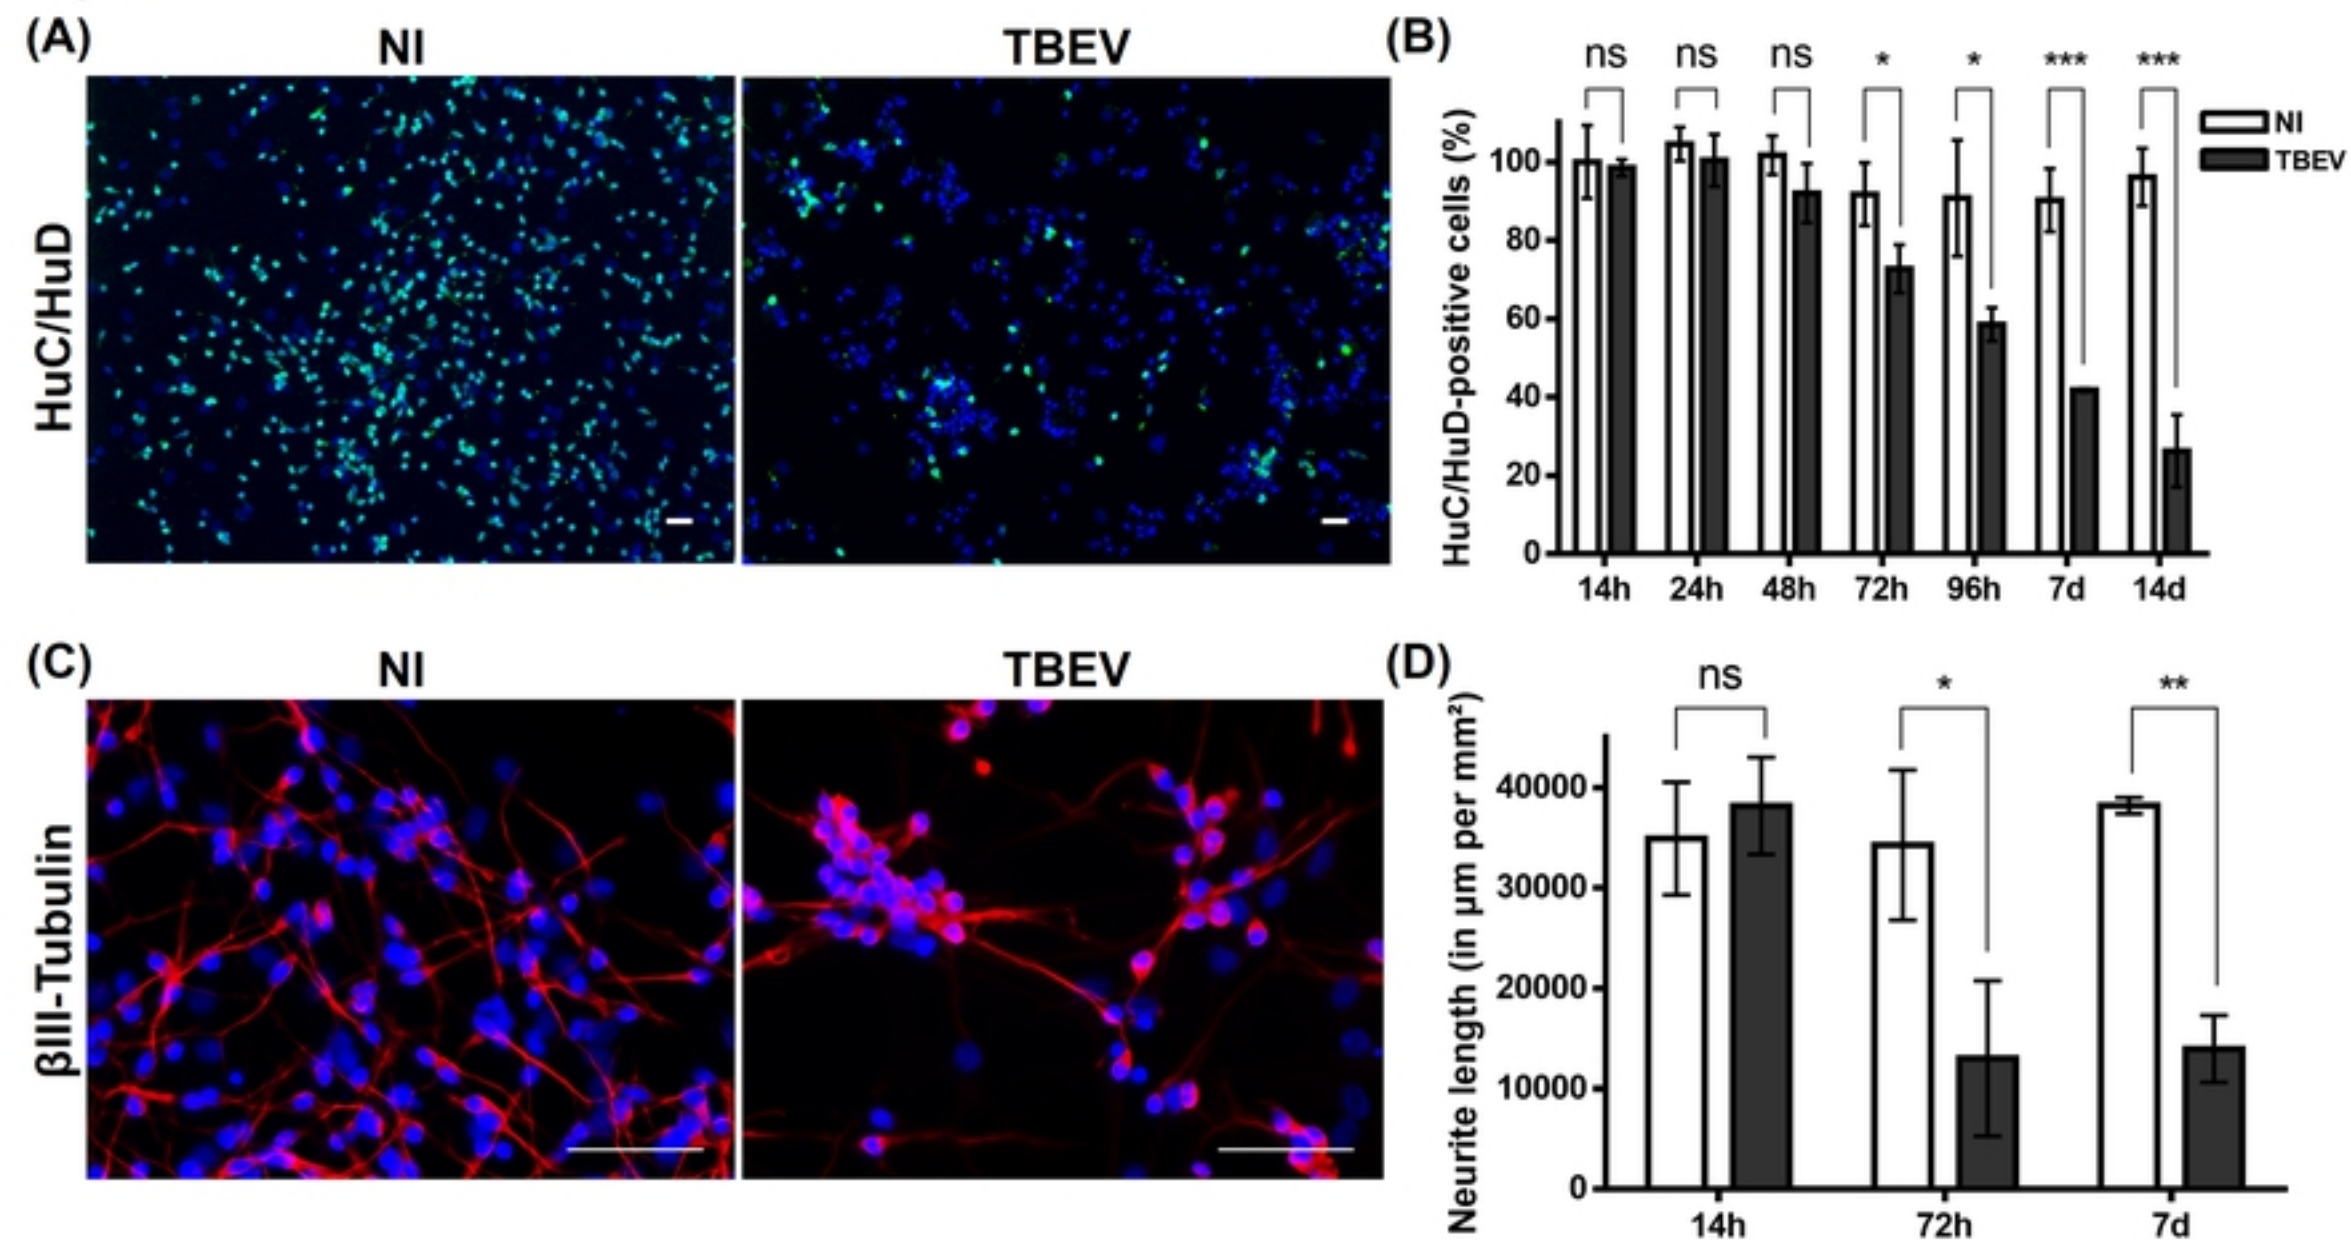

Figure 3

Fig.4

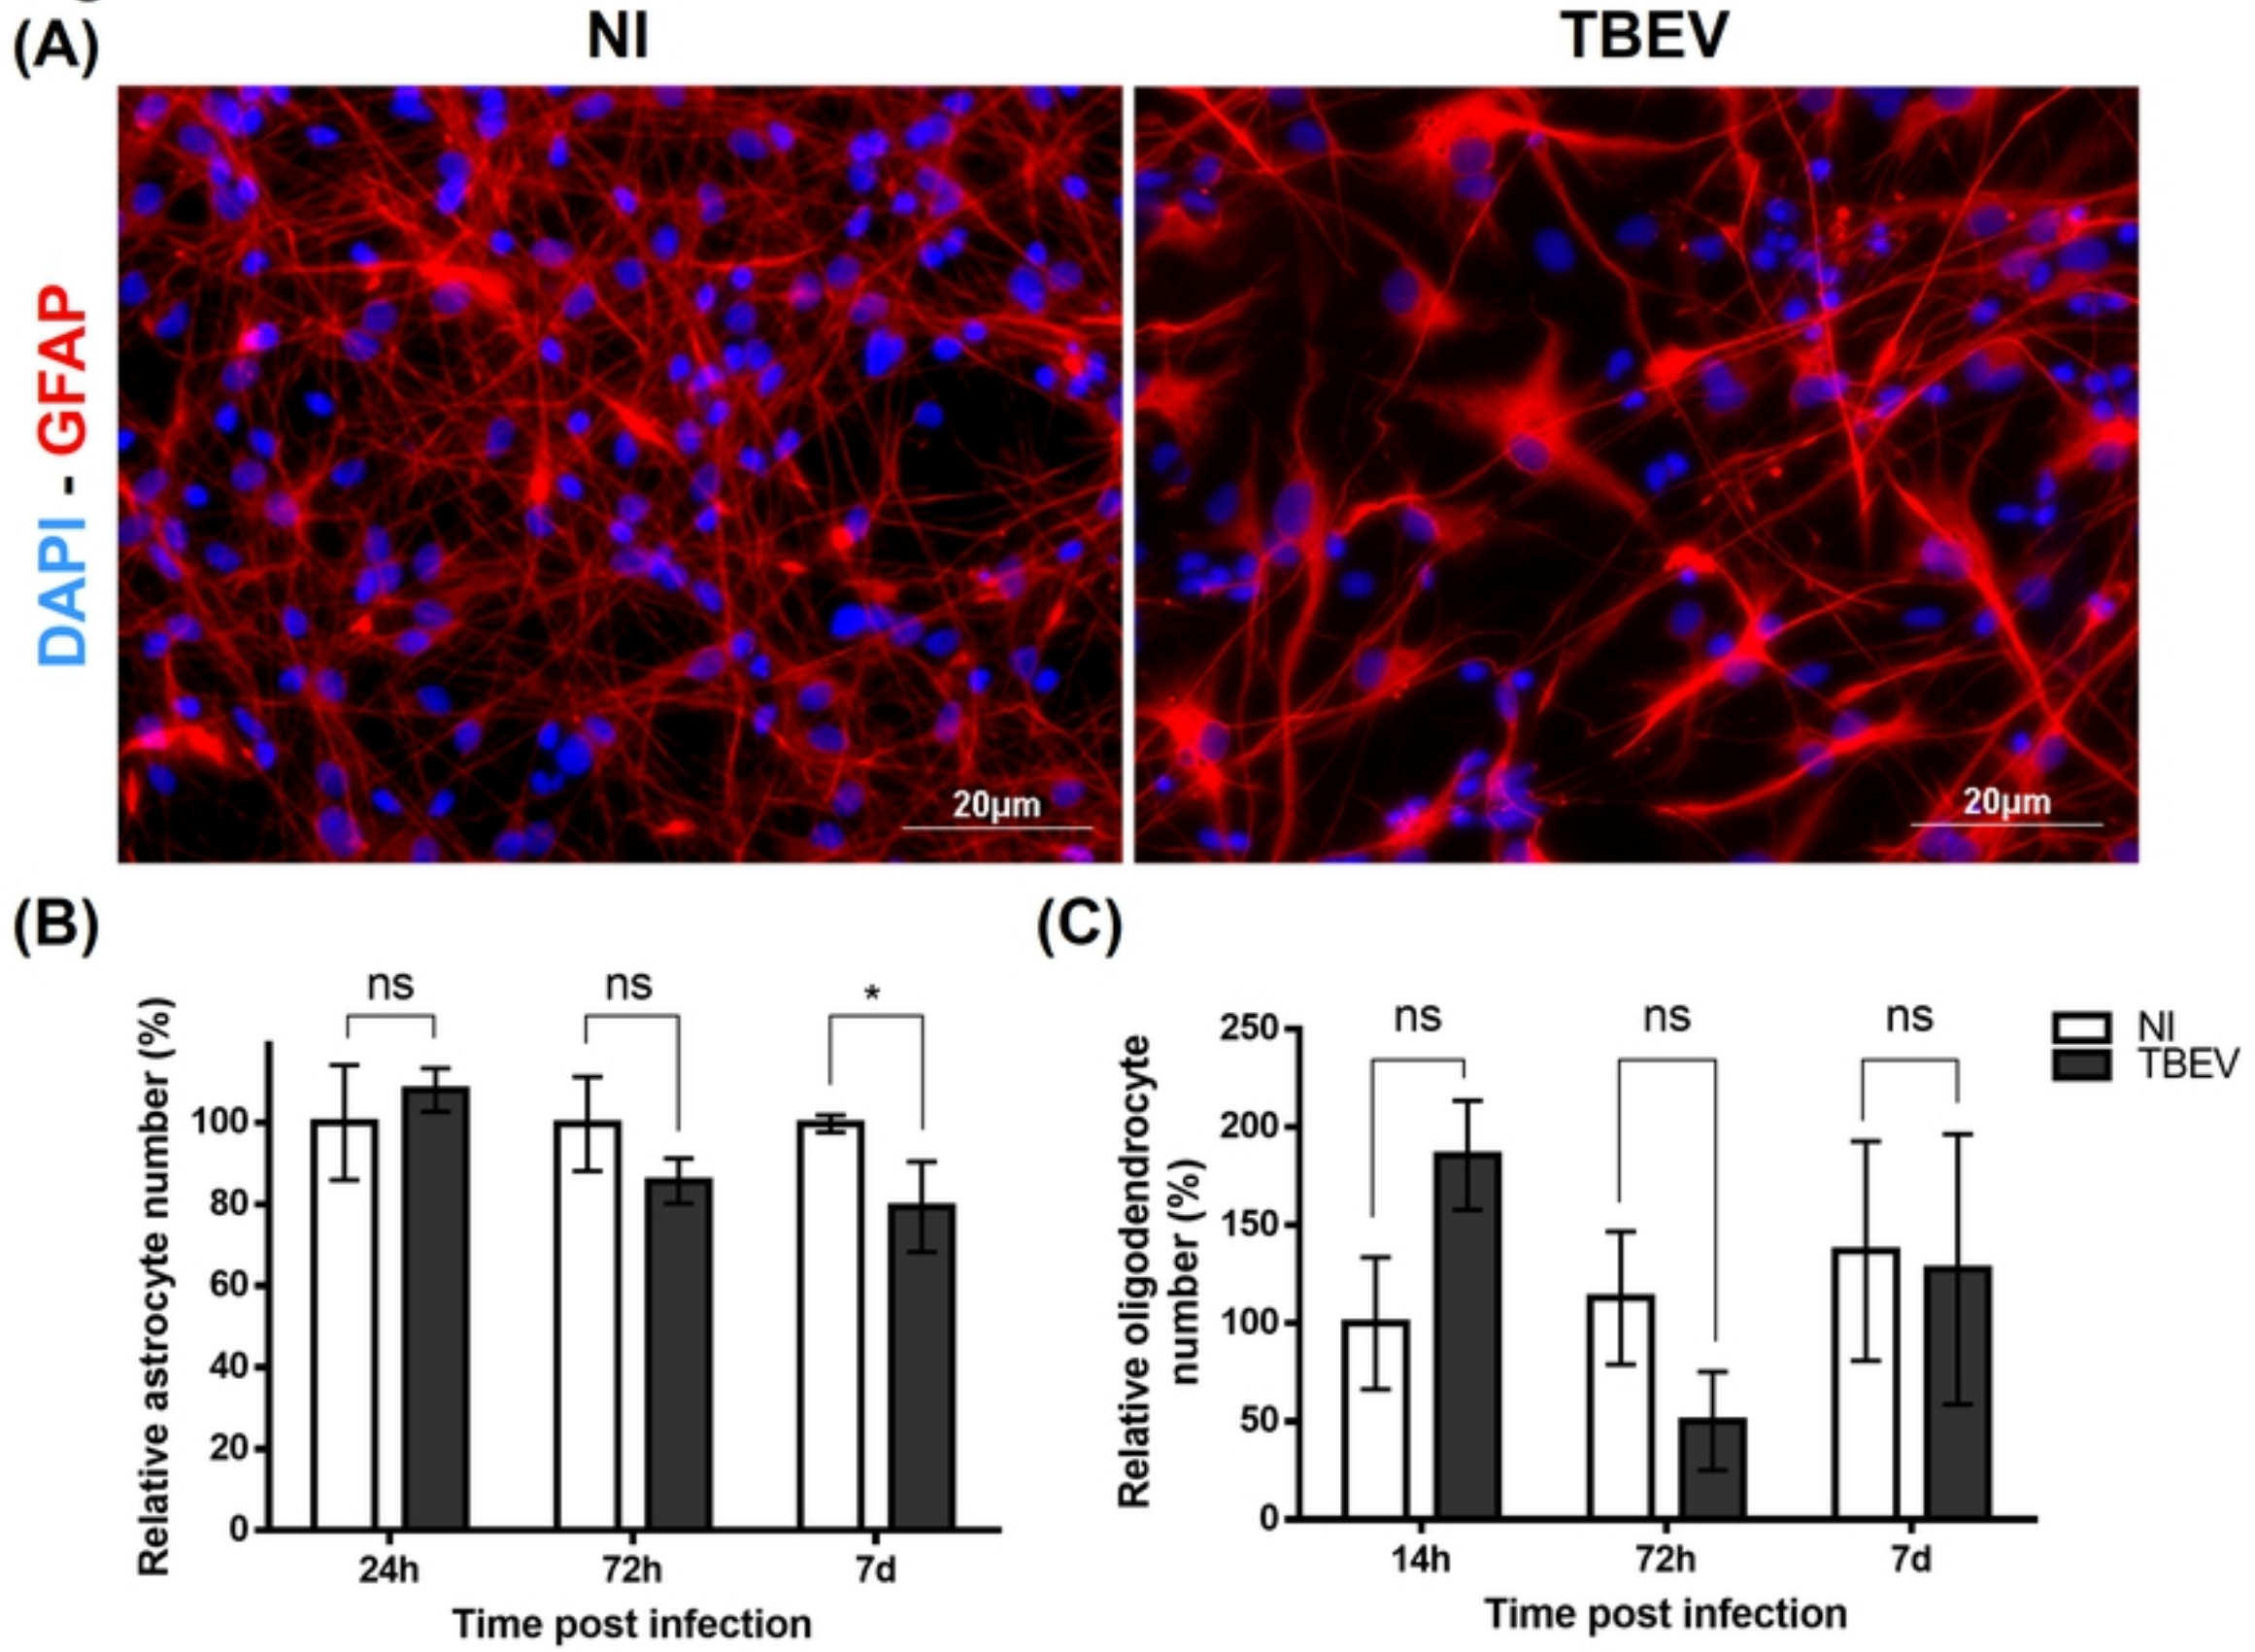

Figure 4

**Fig.5**

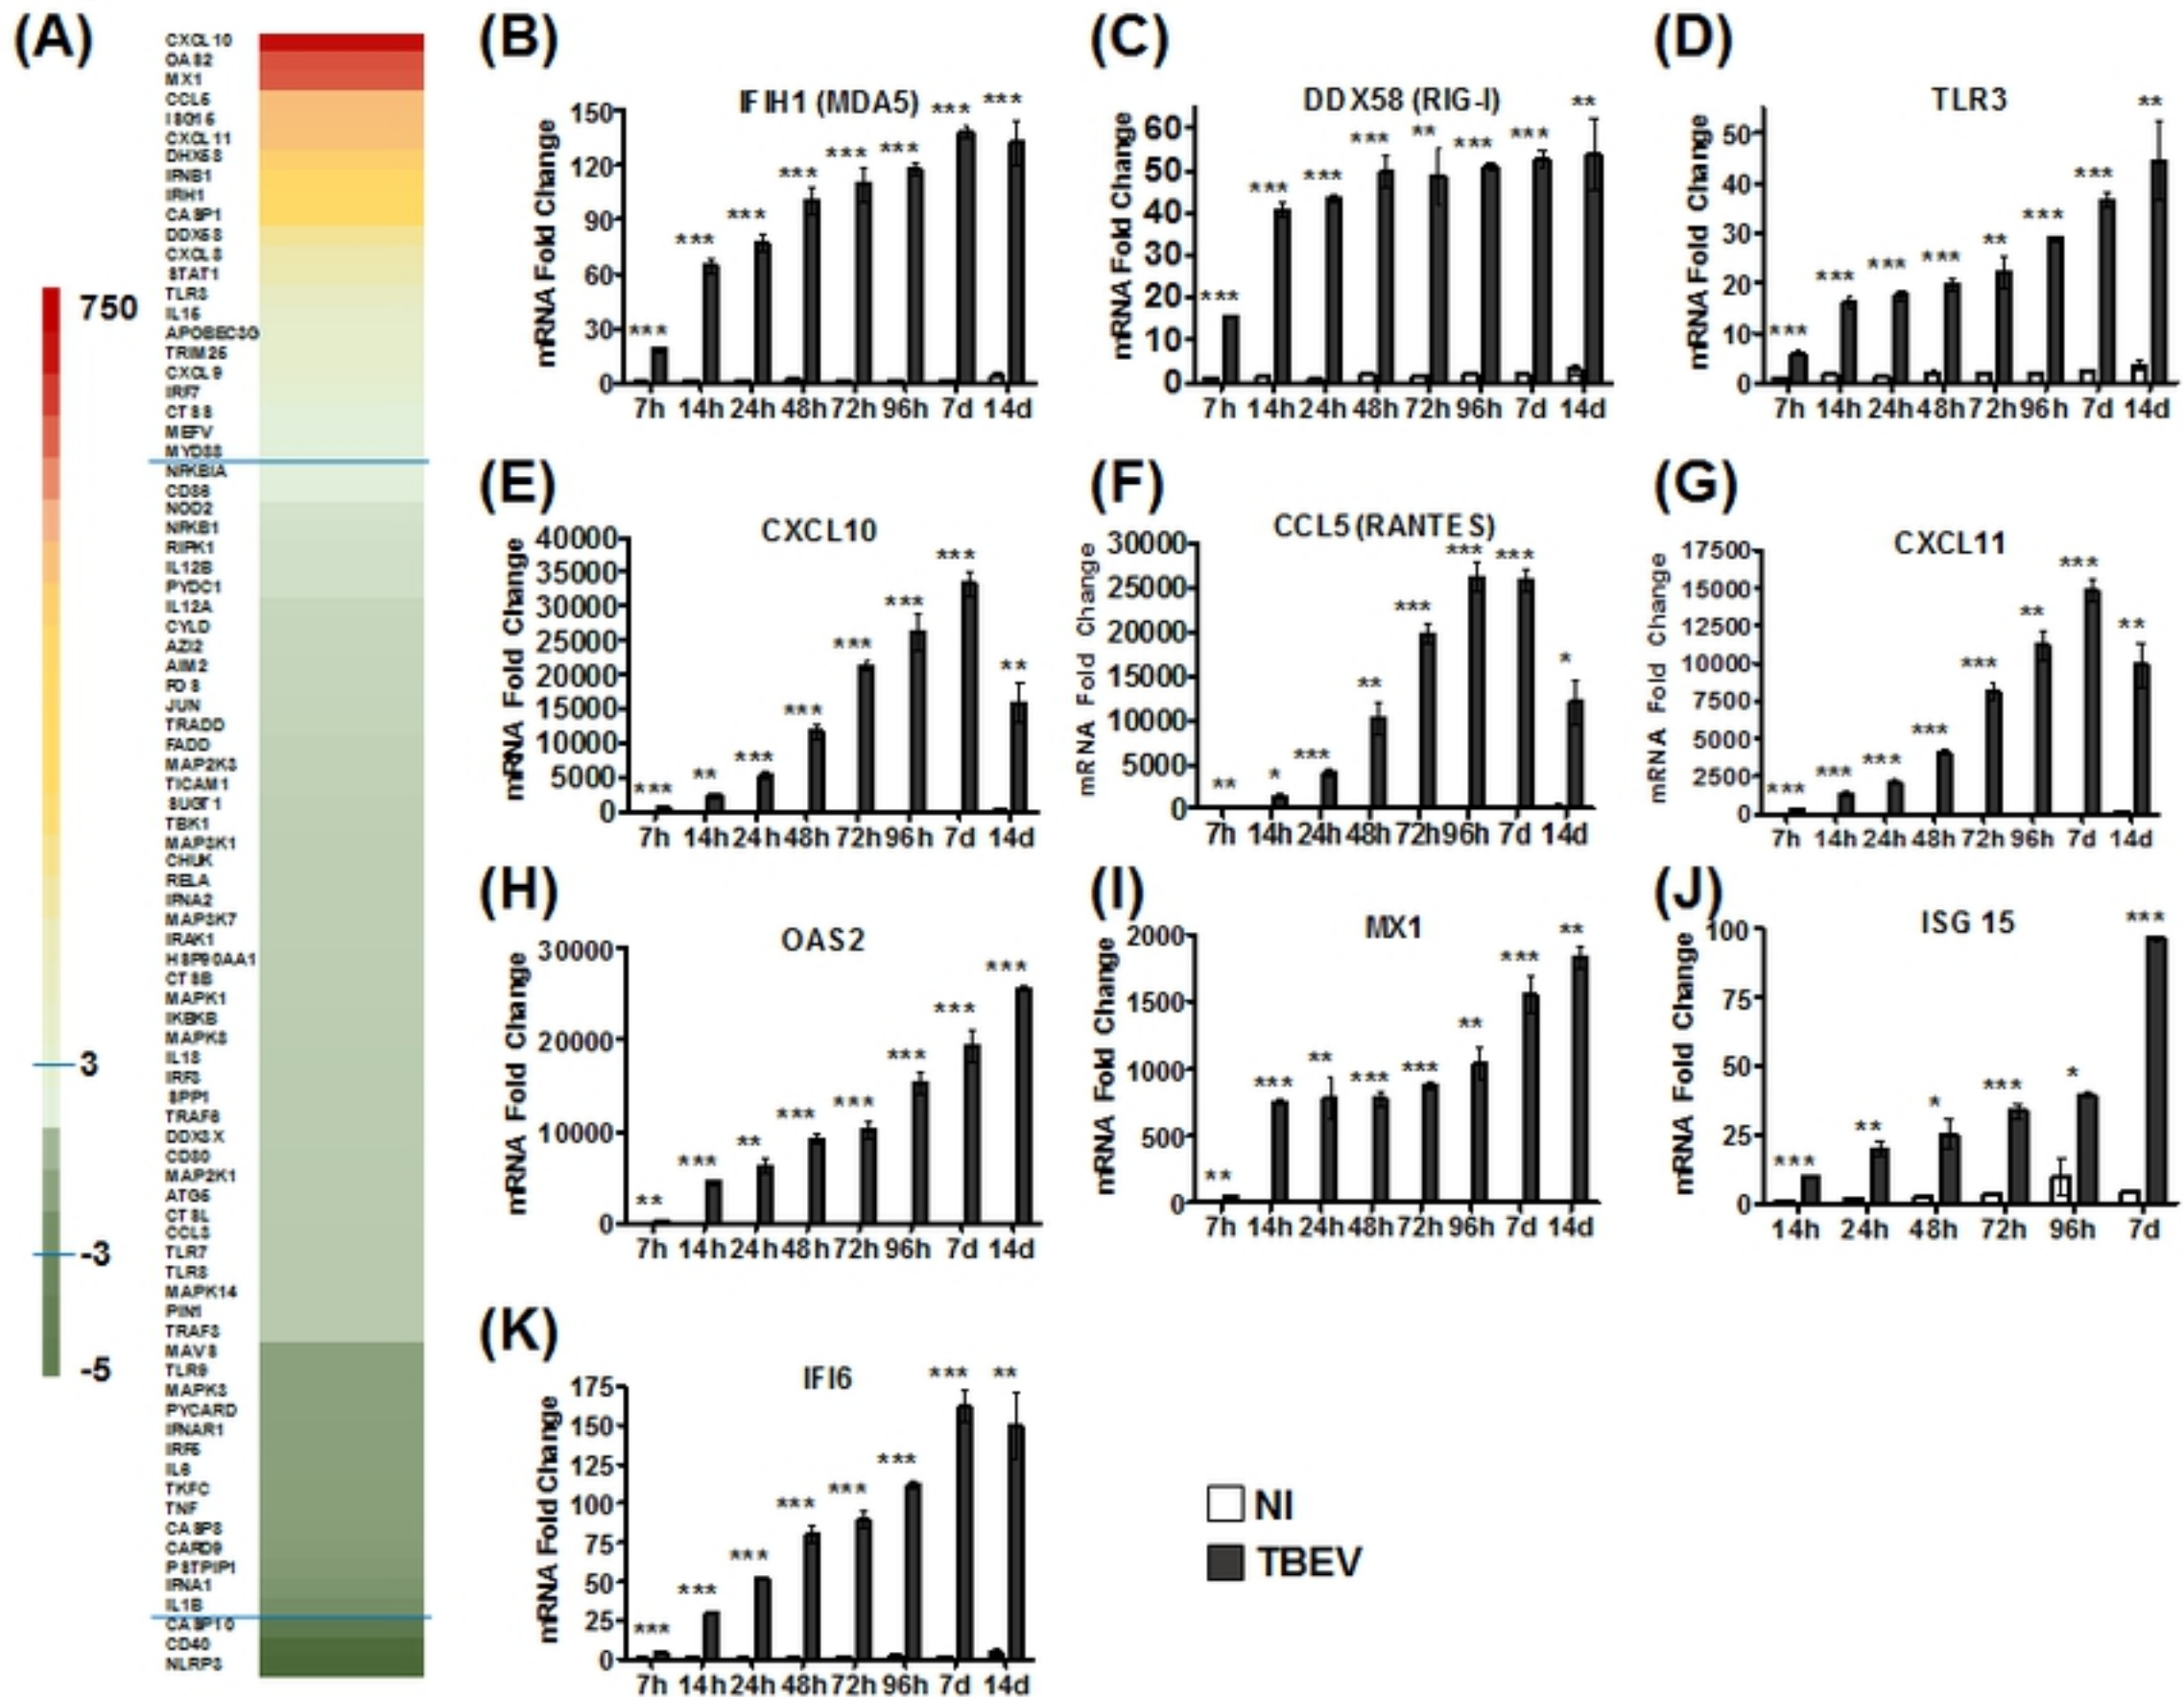

Figure 5

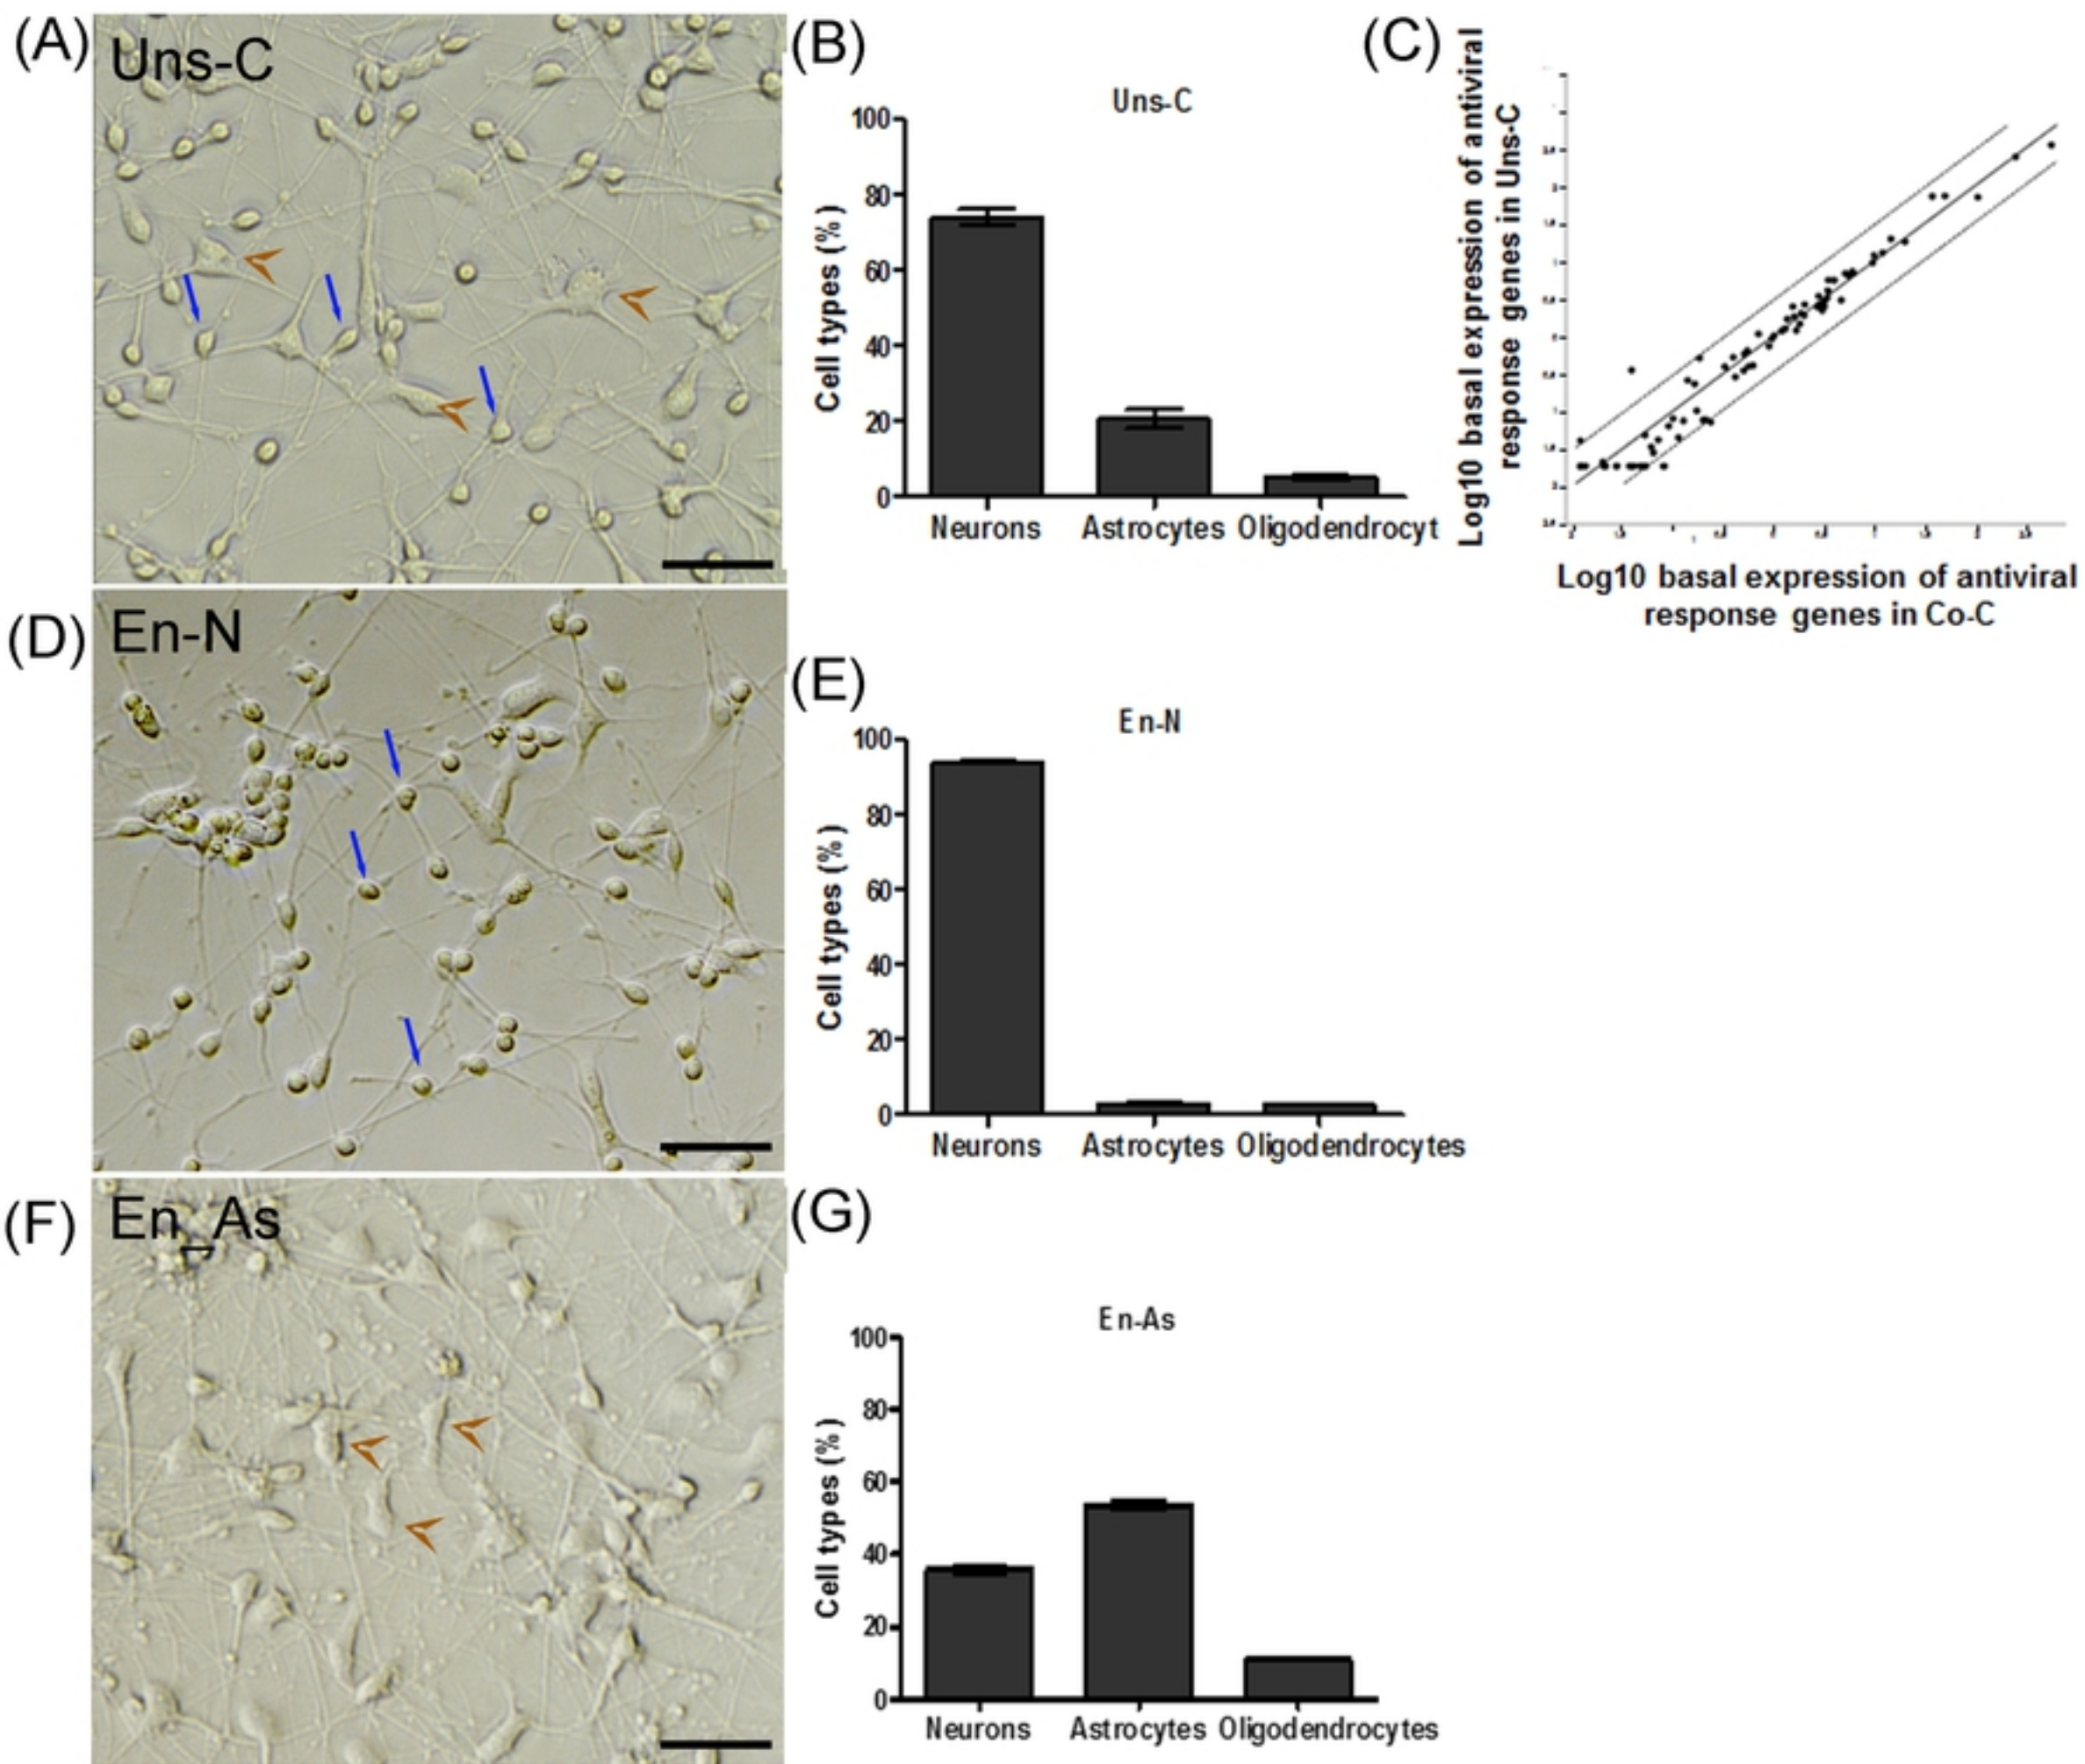

Figure 6

**Fig.7**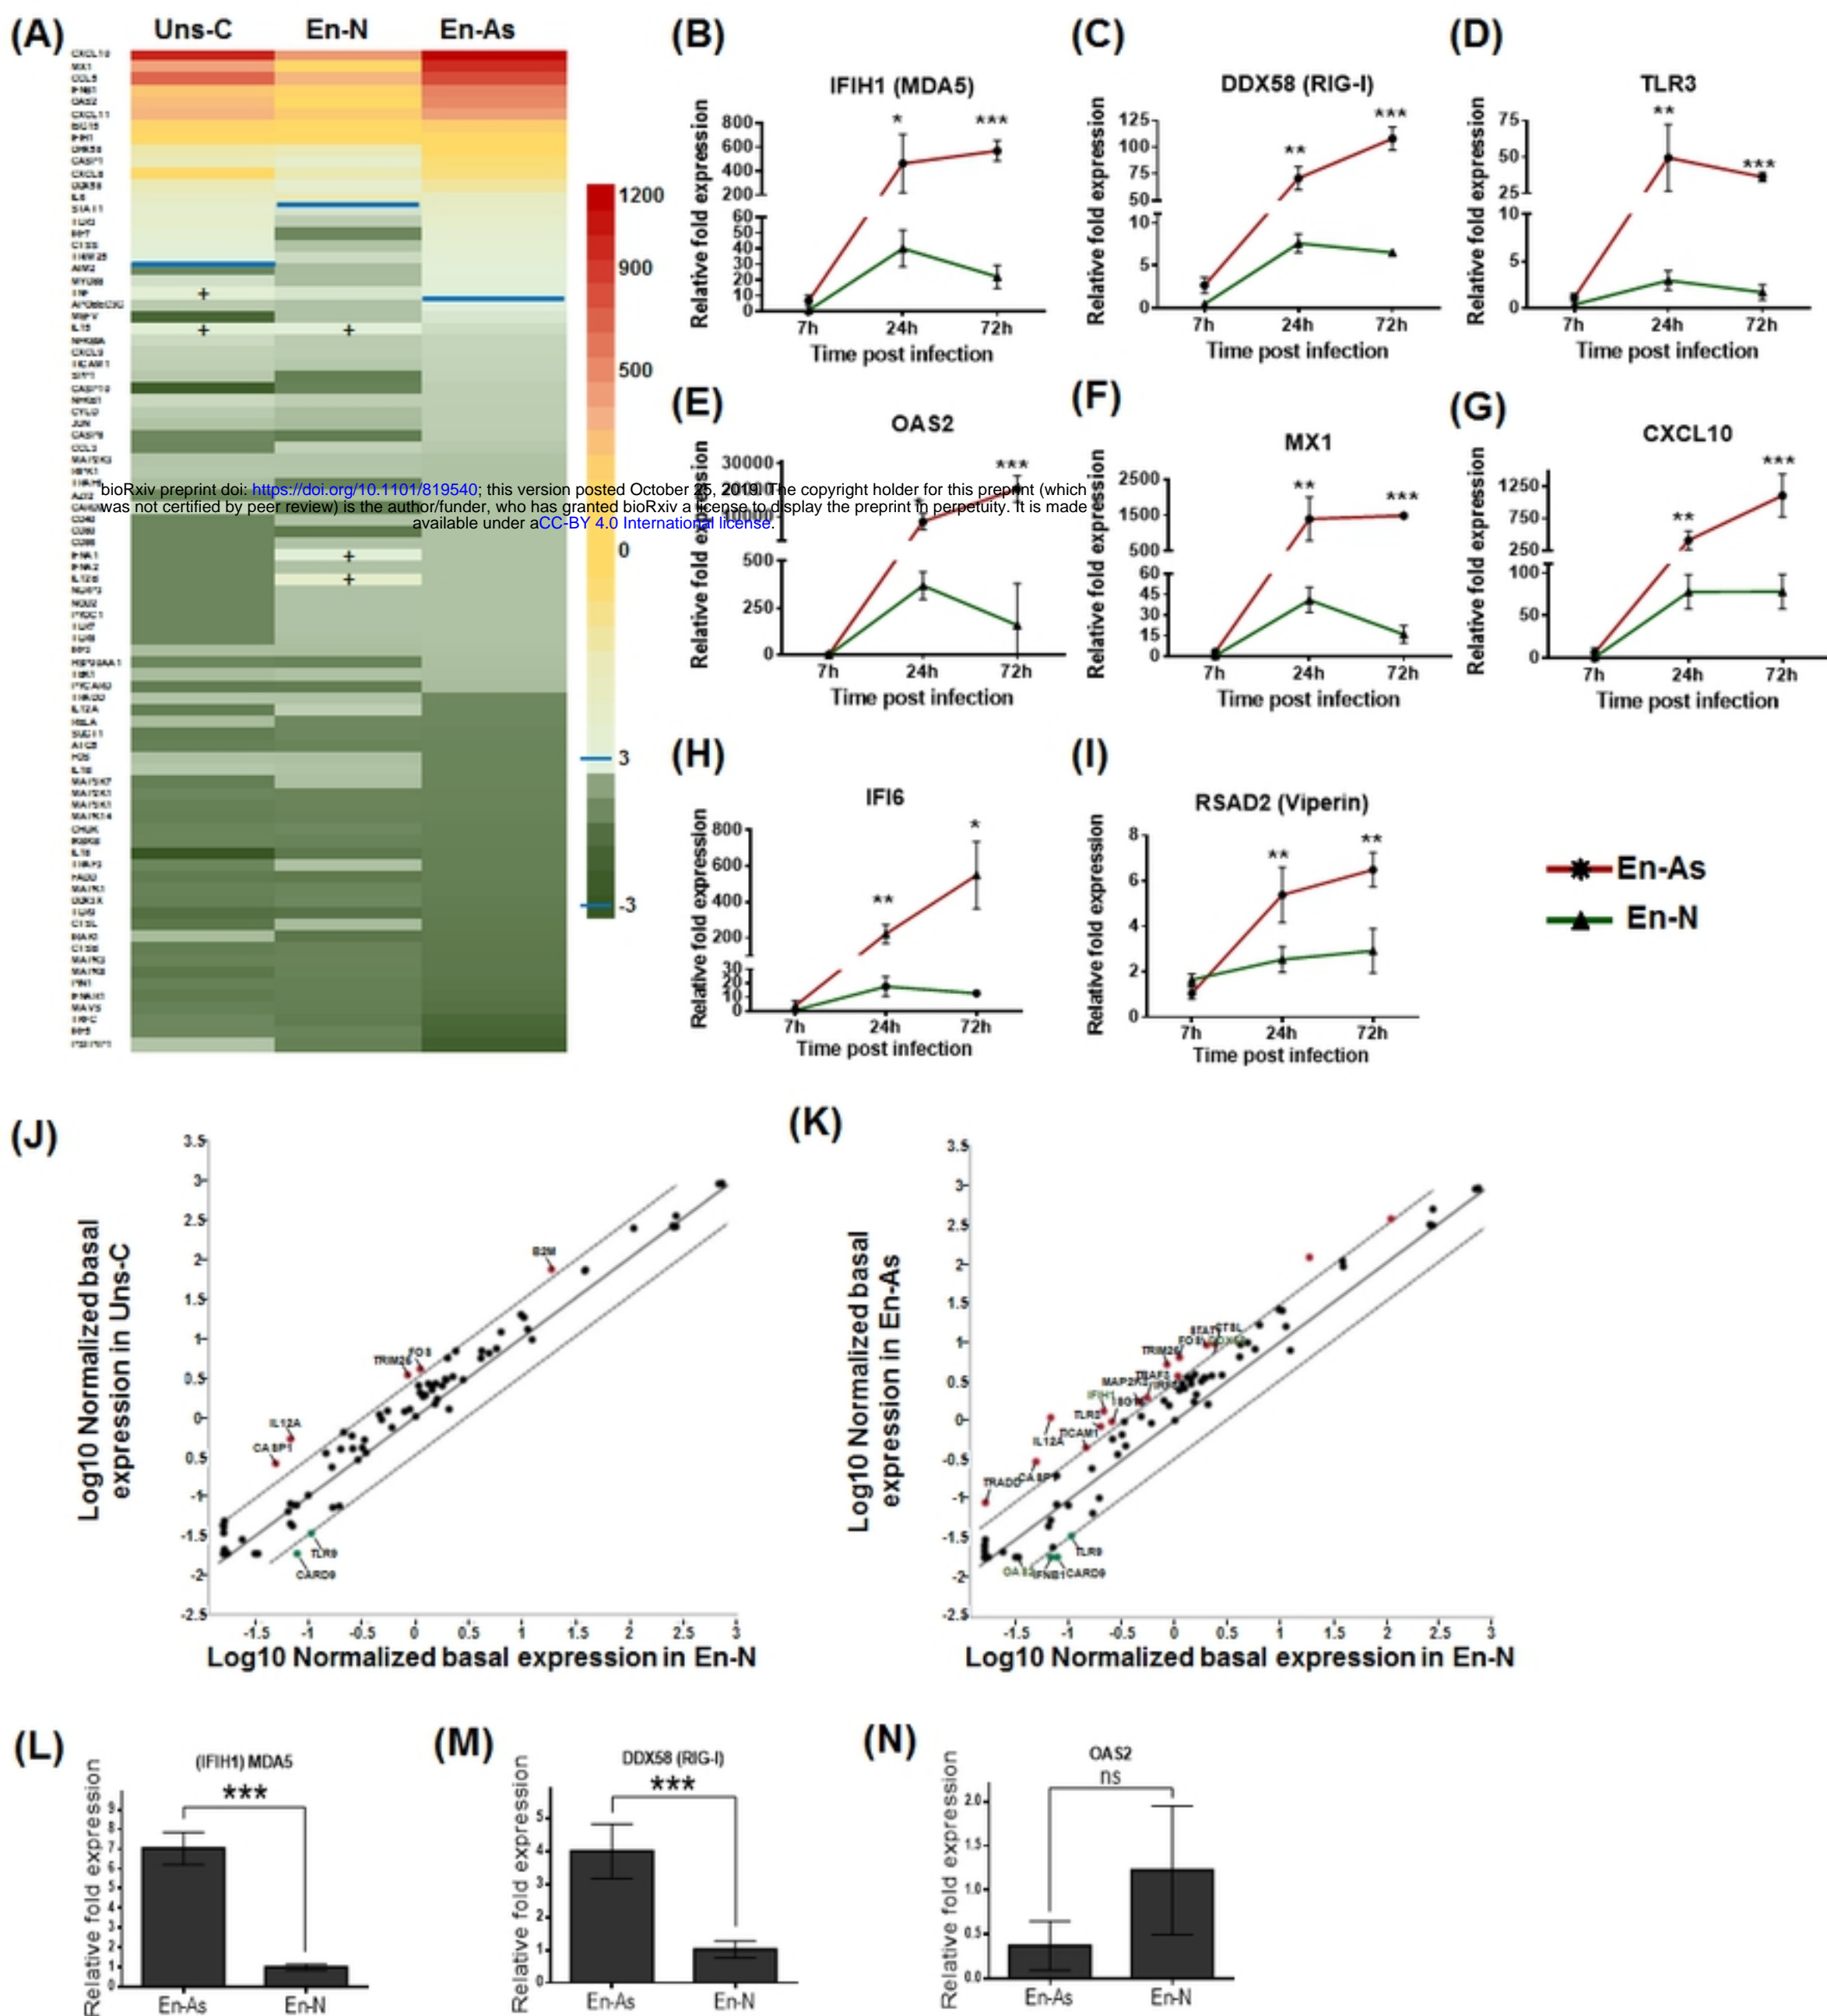**Figure 7**

Fig.8

(A)

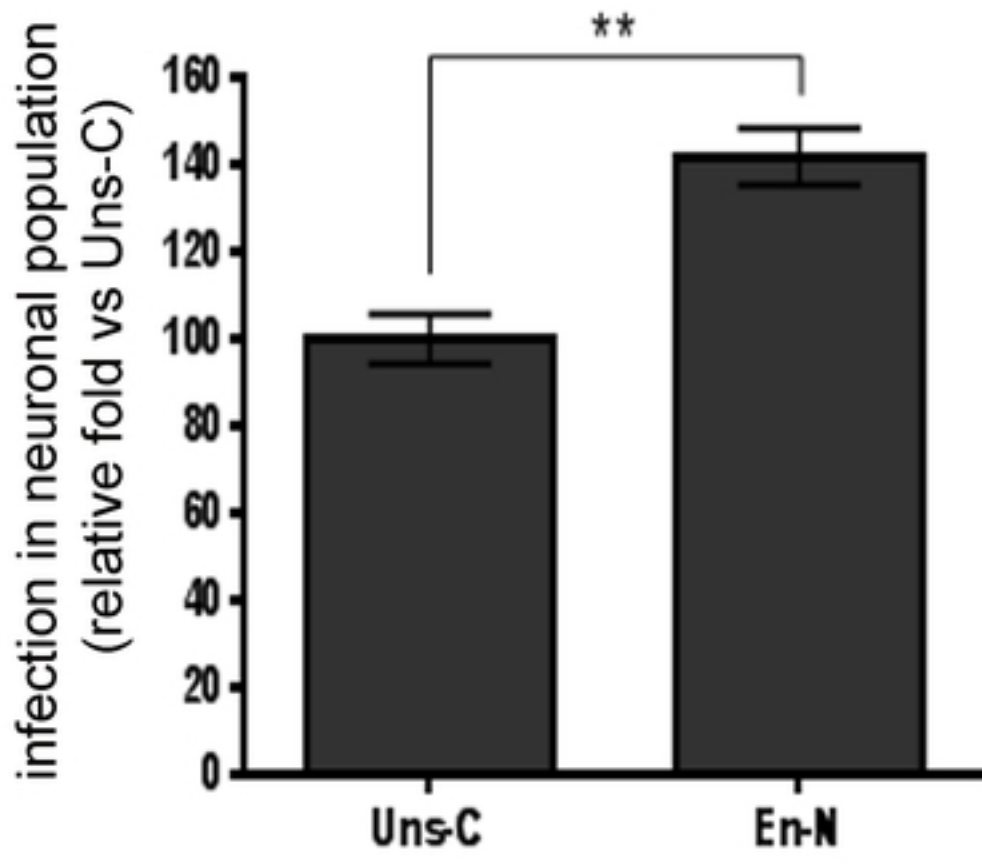

(B) bioRxiv preprint doi: <https://doi.org/10.1101/819540>; this version posted October 25, 2019. The copyright holder for this preprint (which was not certified by peer review) is the author/funder, who has granted bioRxiv a license to display the preprint in perpetuity. It is made available under aCC-BY 4.0 International license.

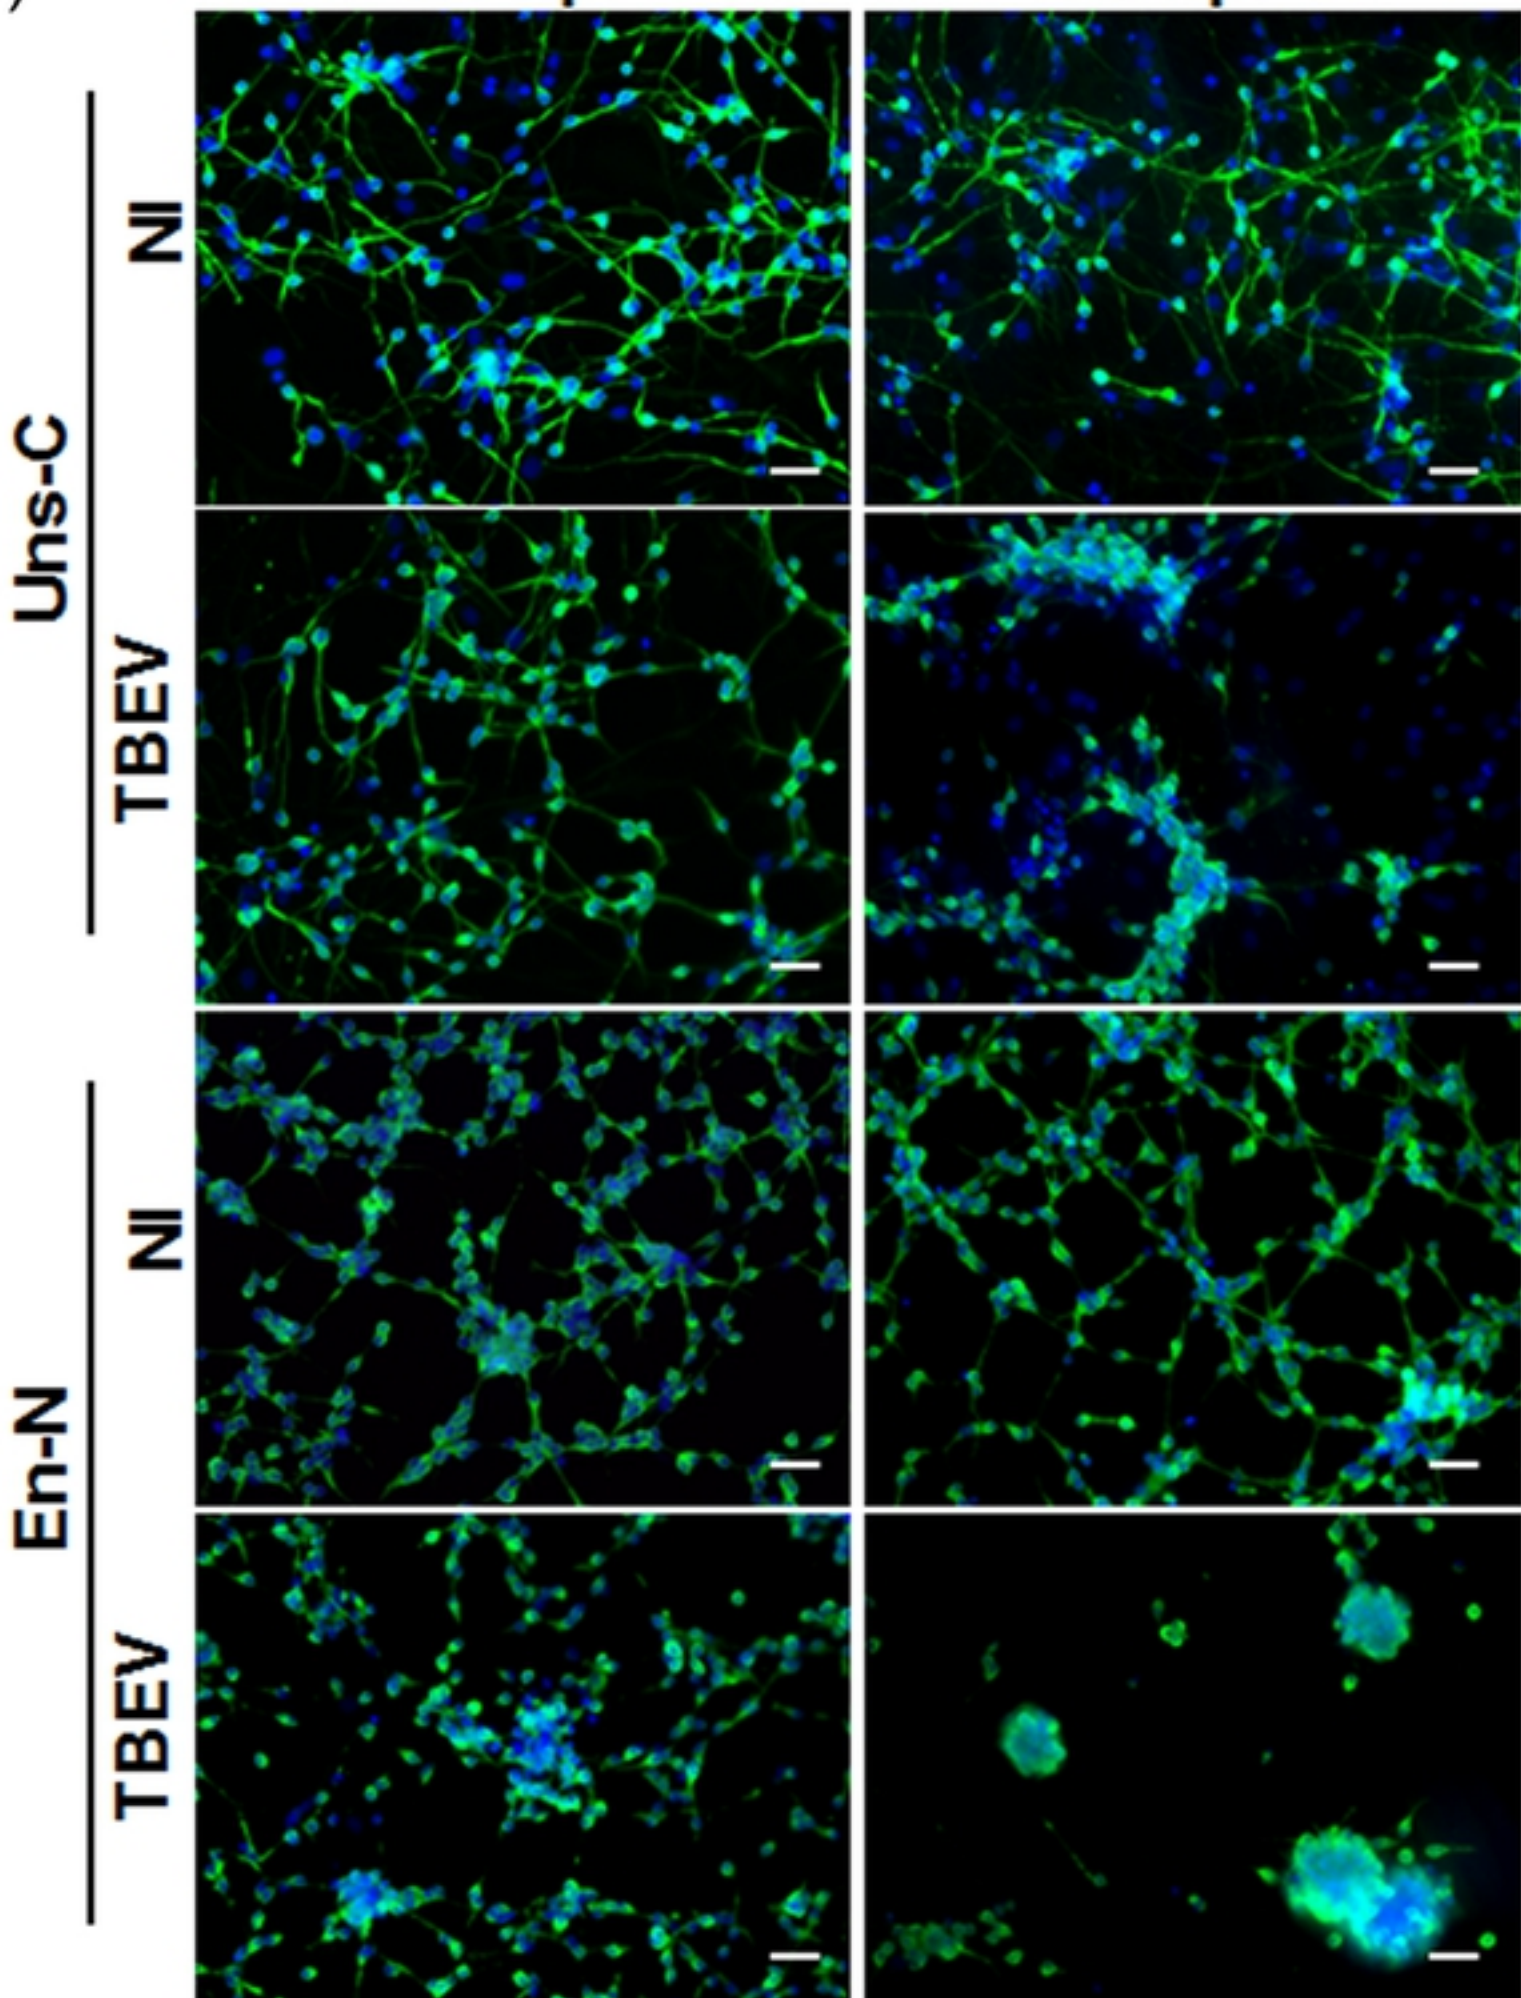

Figure 8

# Fig.9

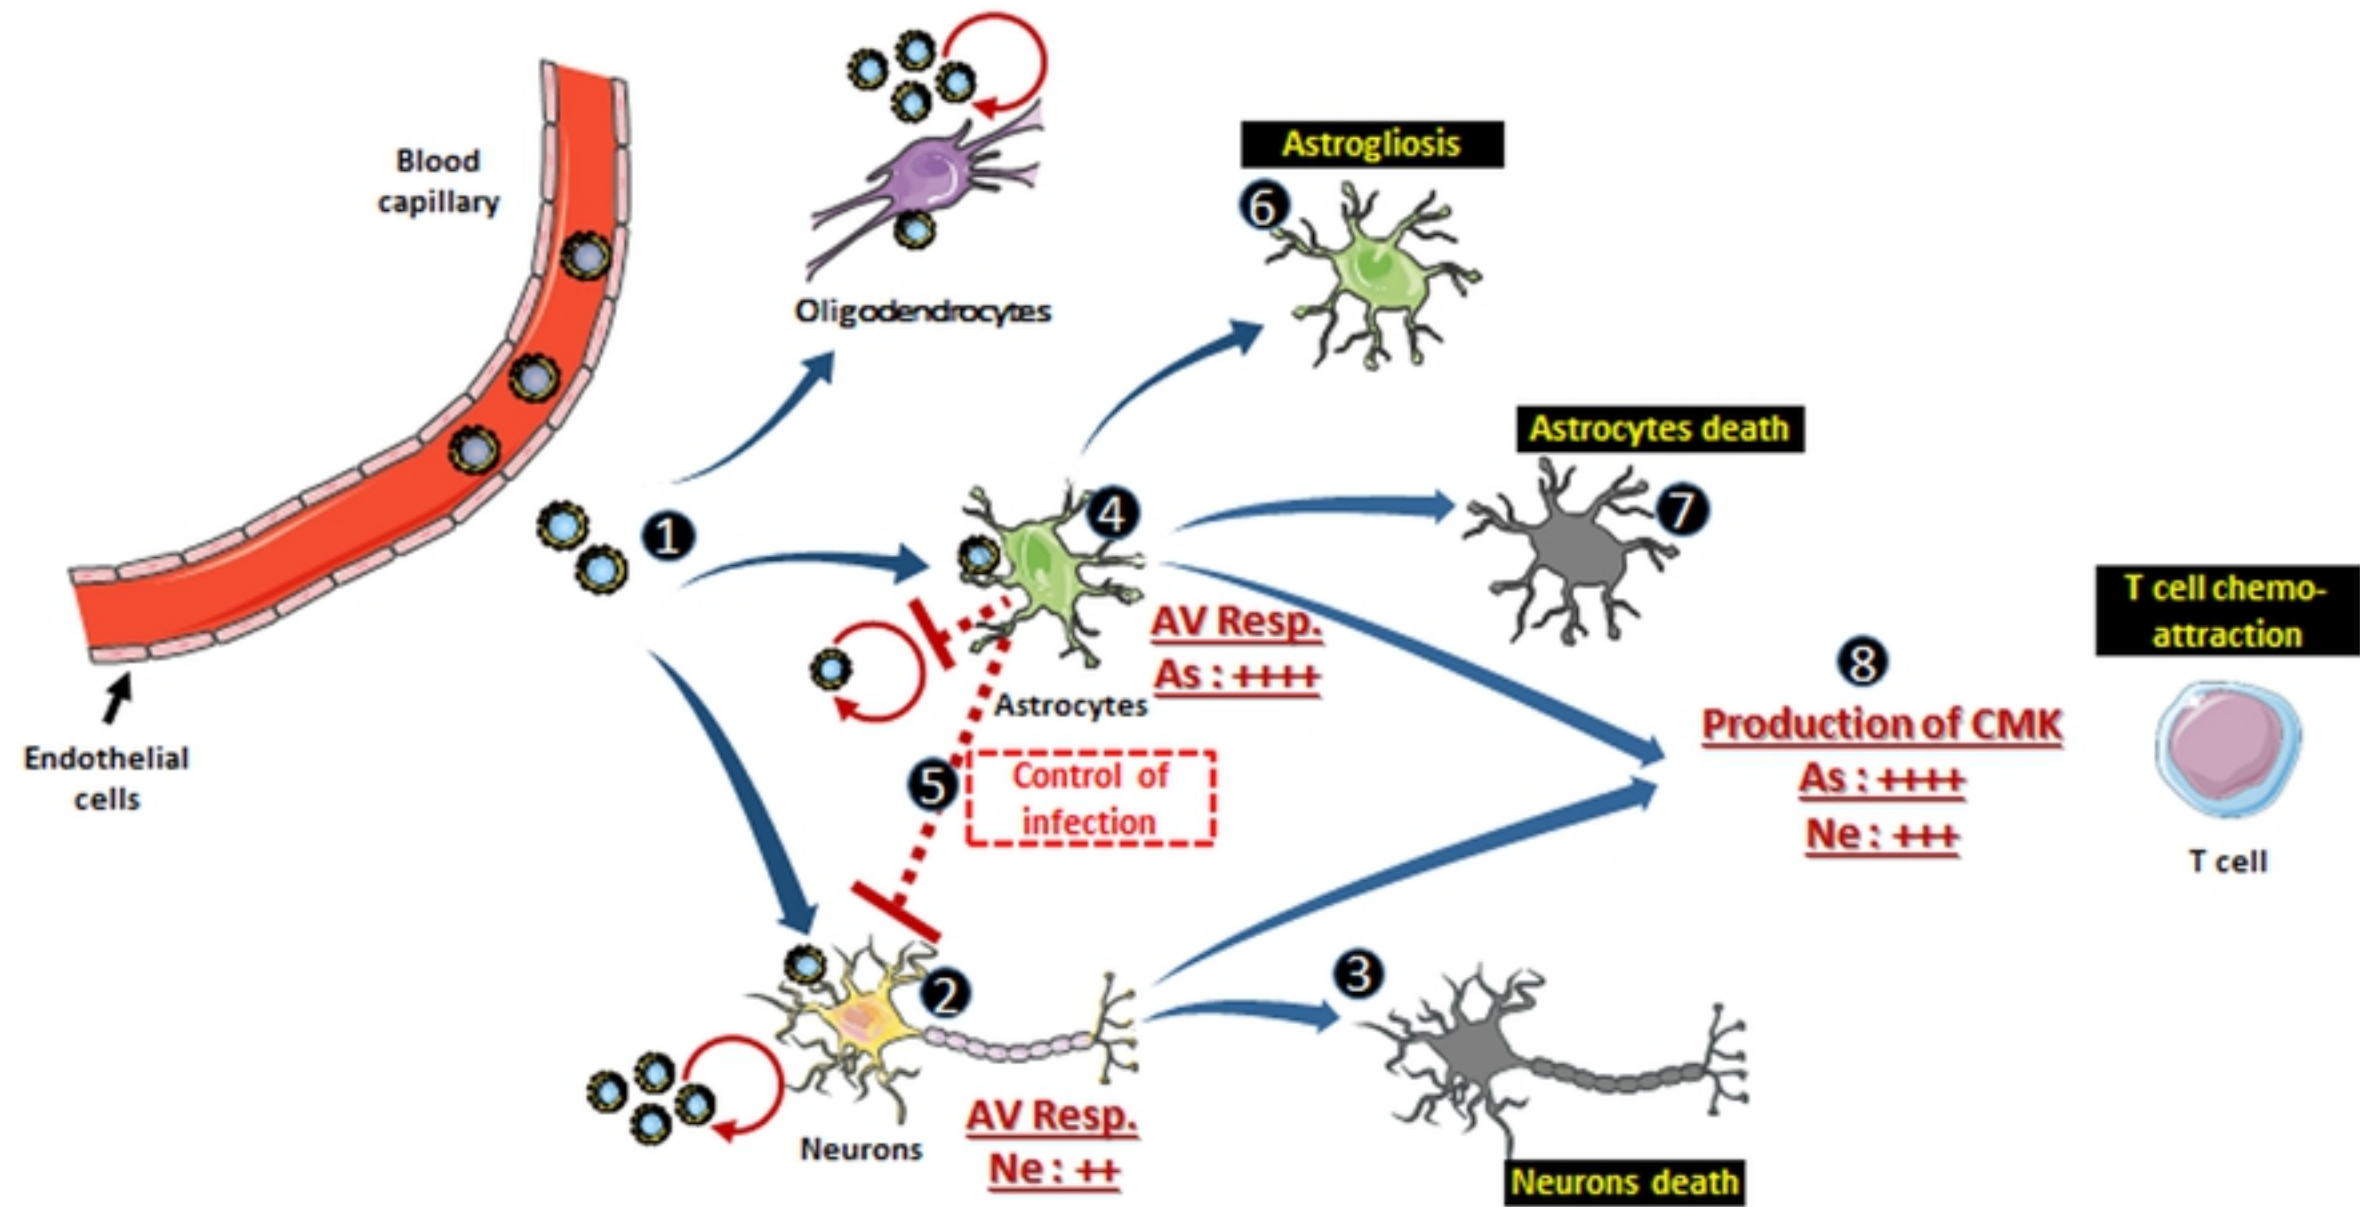

# Figure 9



# S1 Fig

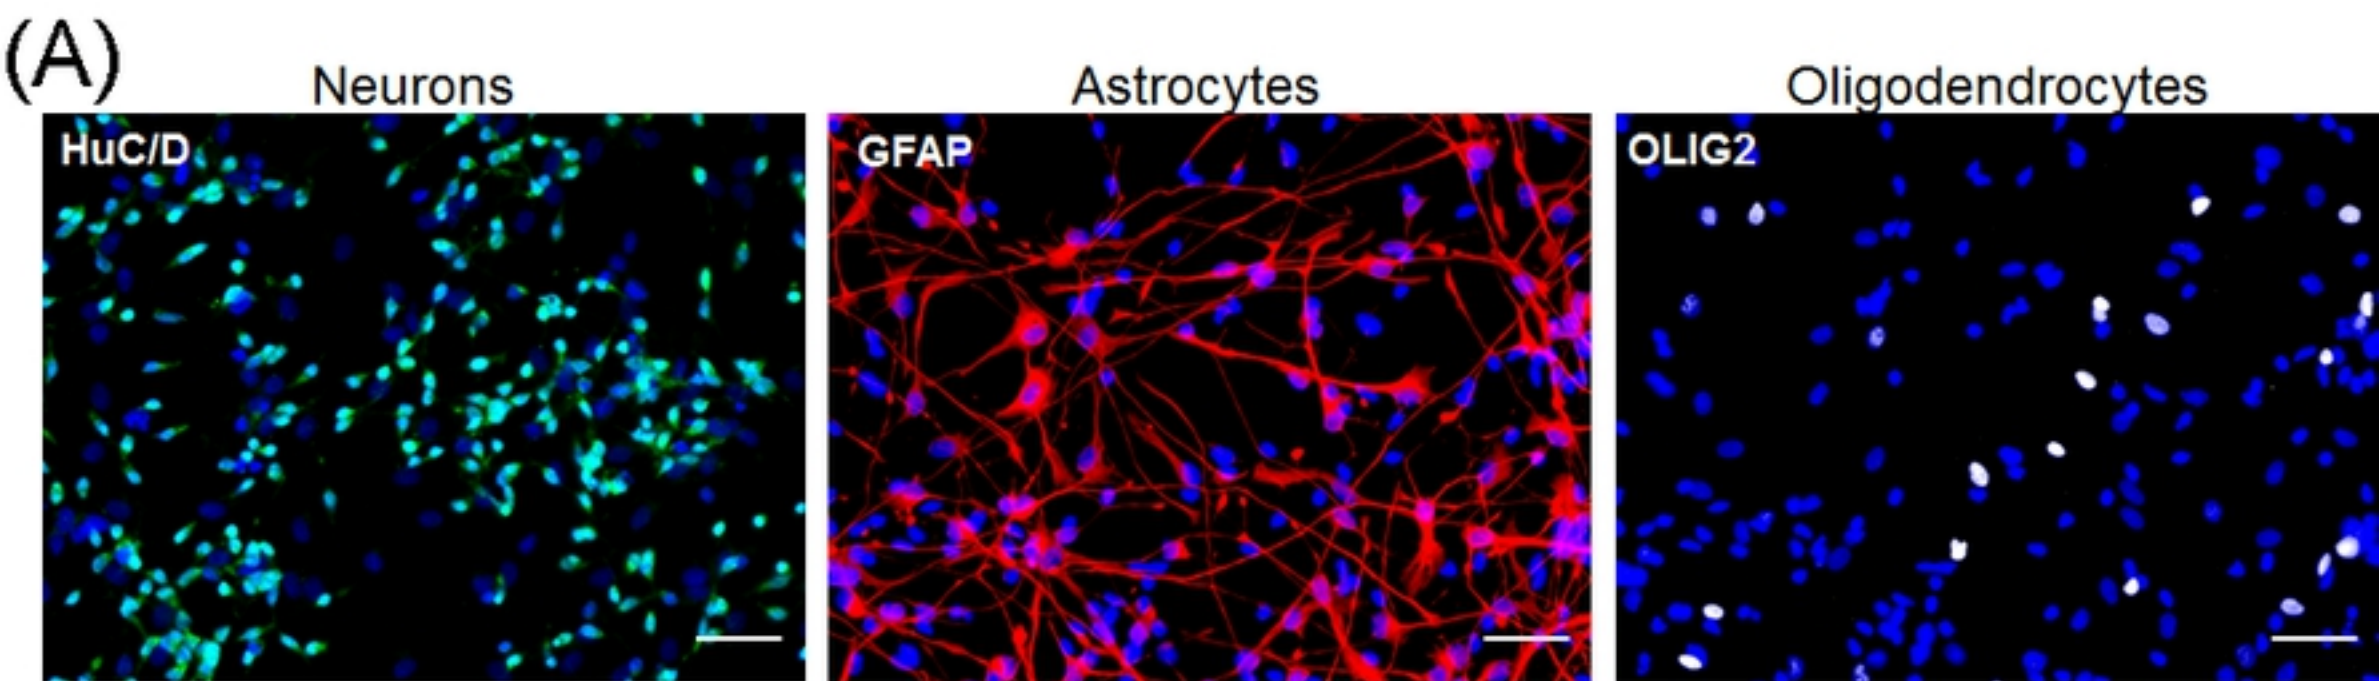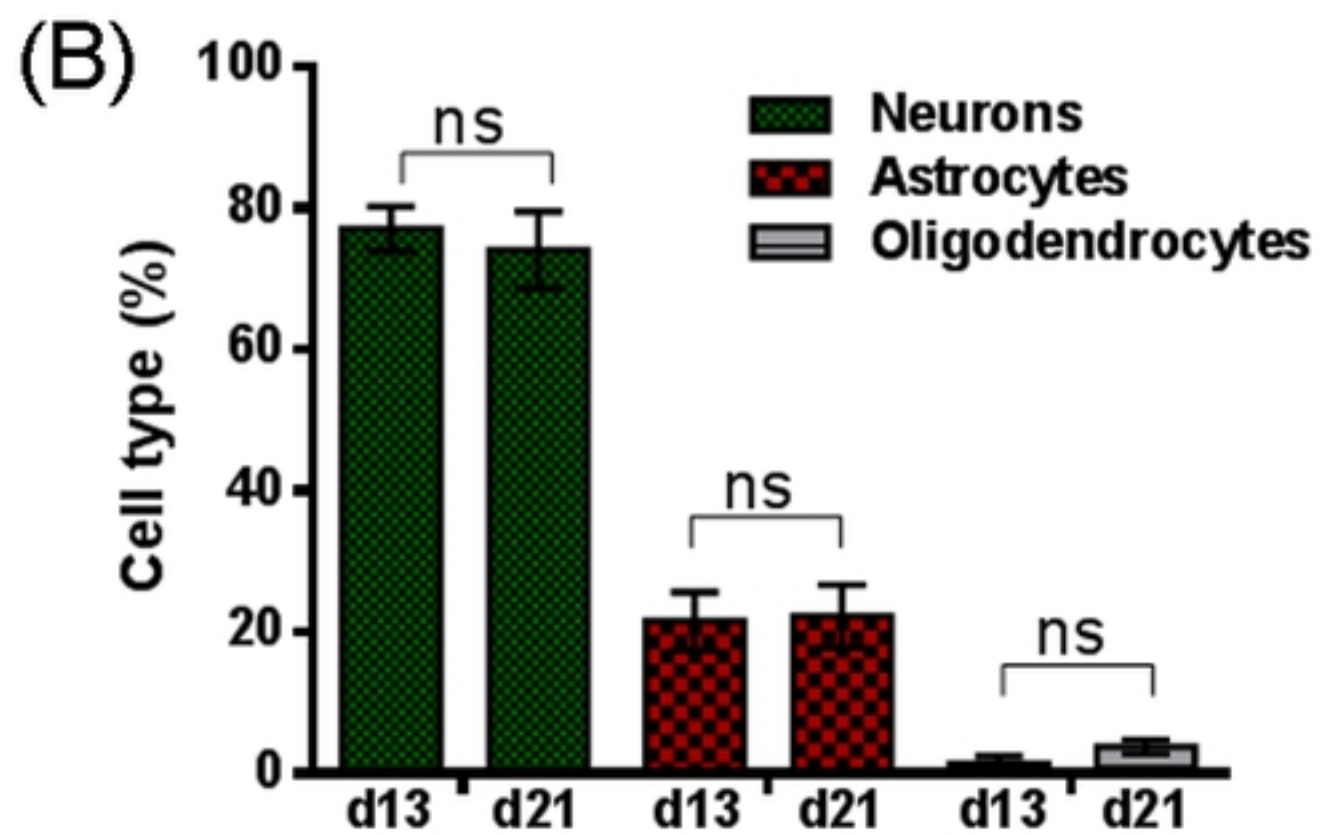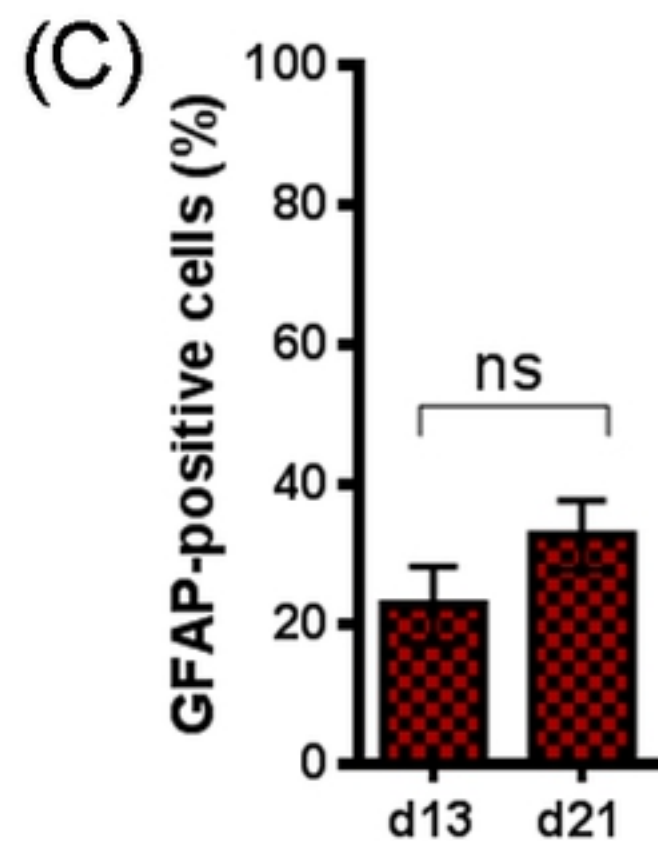

# S2 Fig

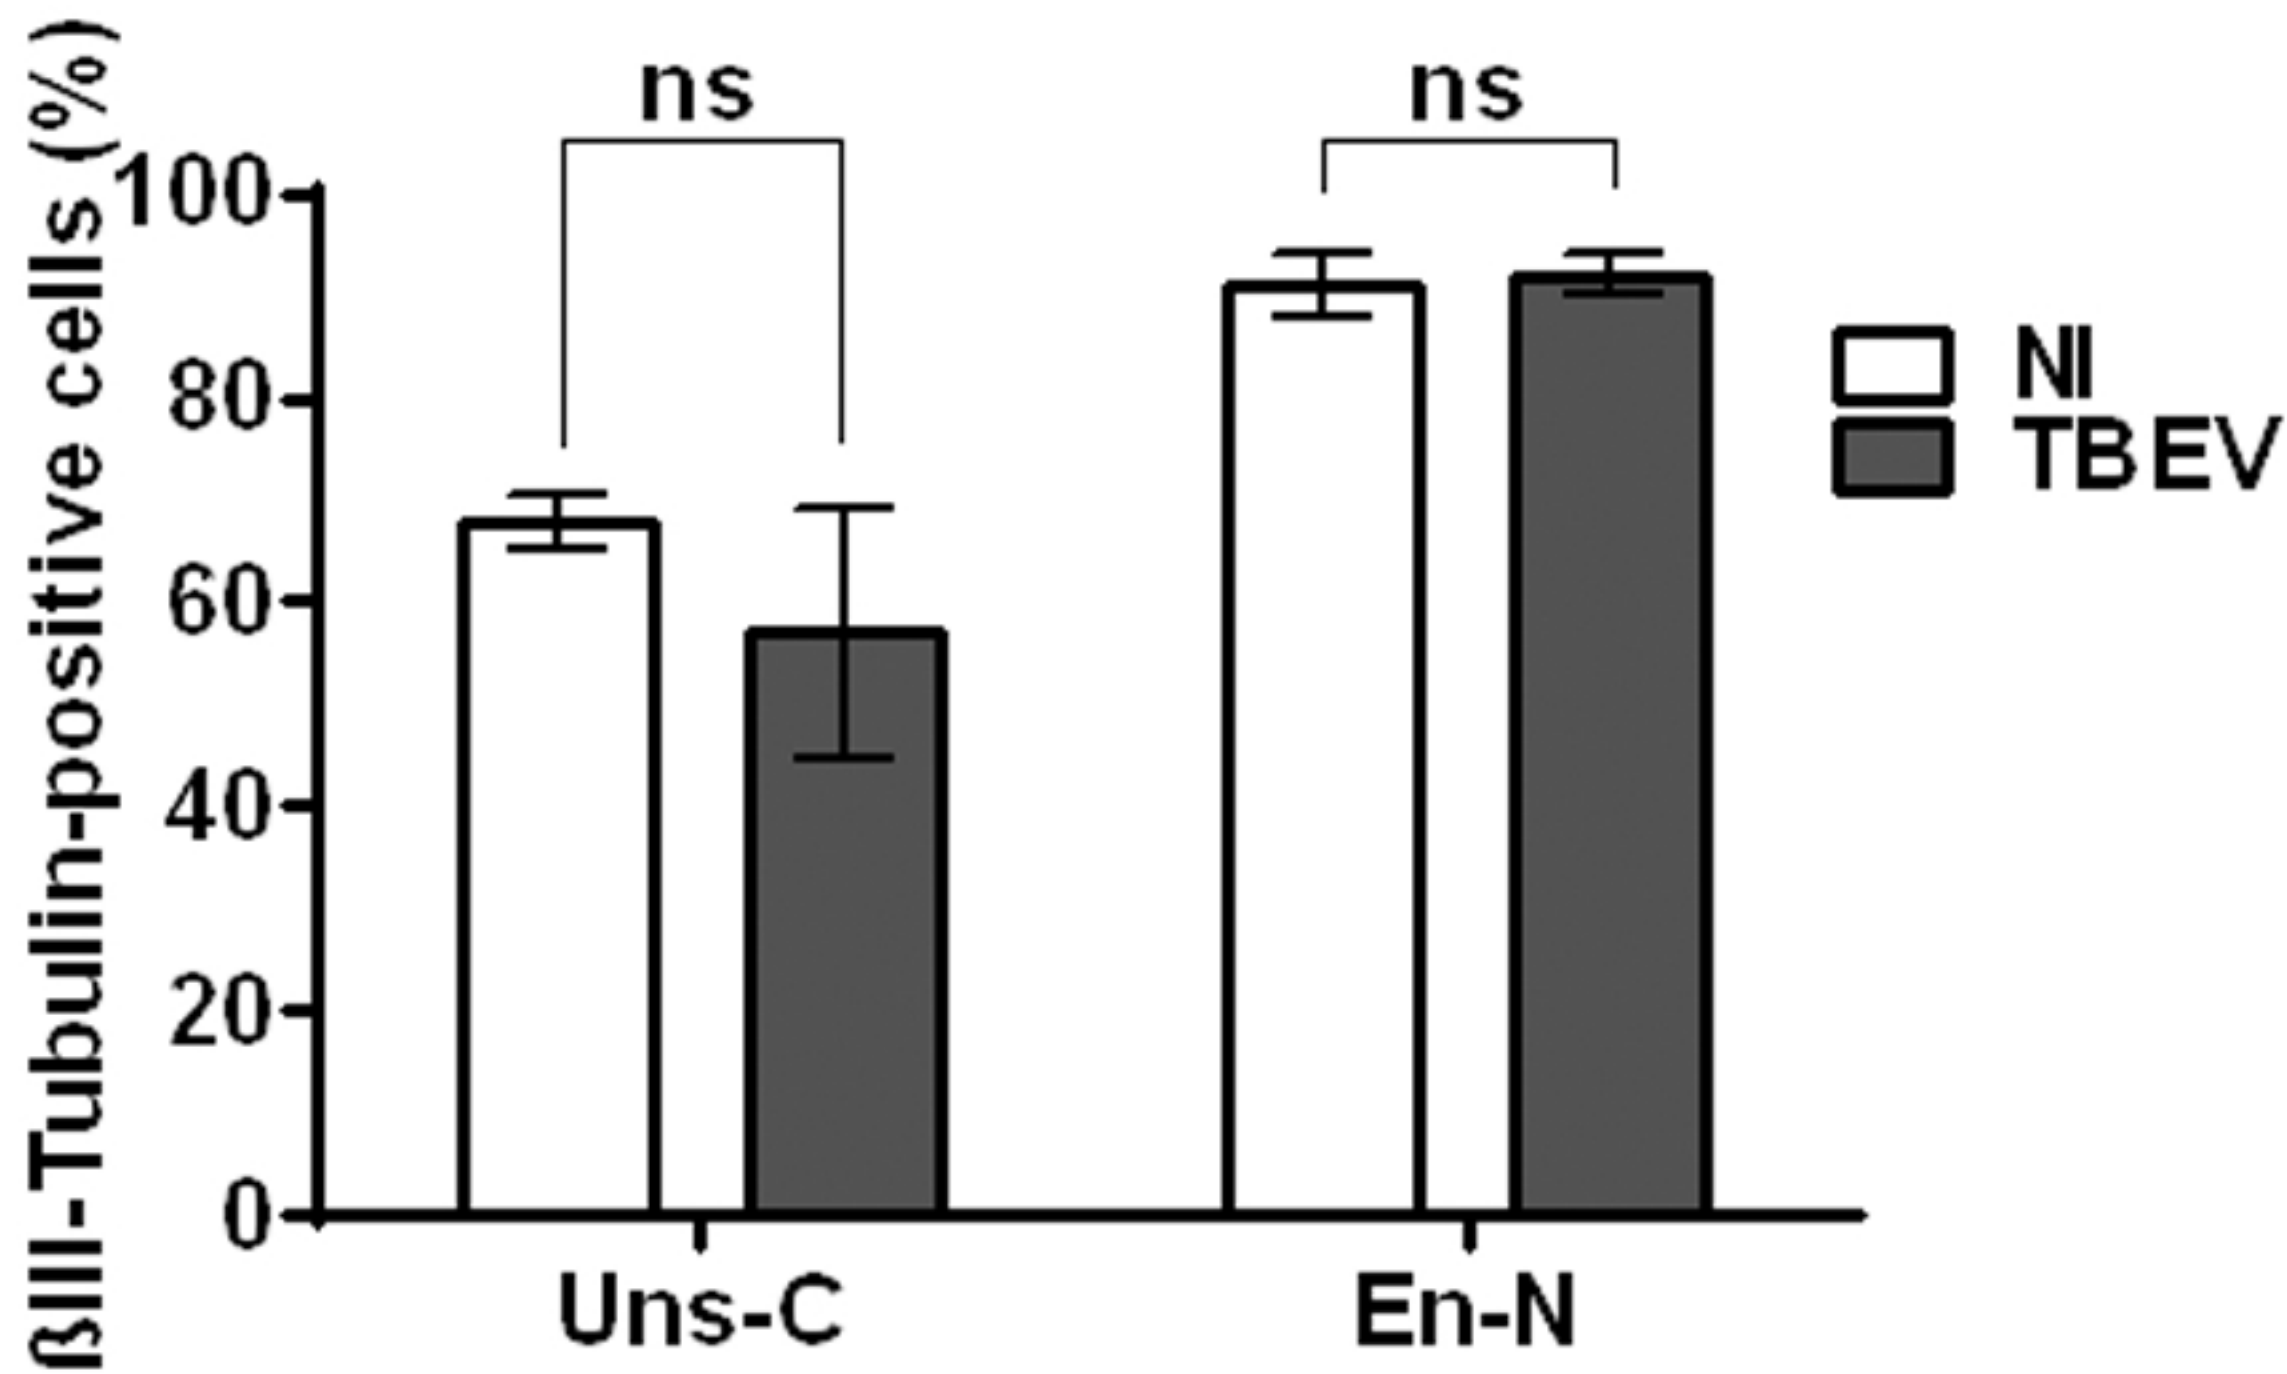

Source: http://biorxiv.org/content/10.1101/819540v1.full.pdf
